# Supplementary material
Source: publisher site journal article supplement (https://www.dovepress.com/article/344861)
Supplement: Supplementary file 1 [file get_supplementary_file.php]

**Figure S1**

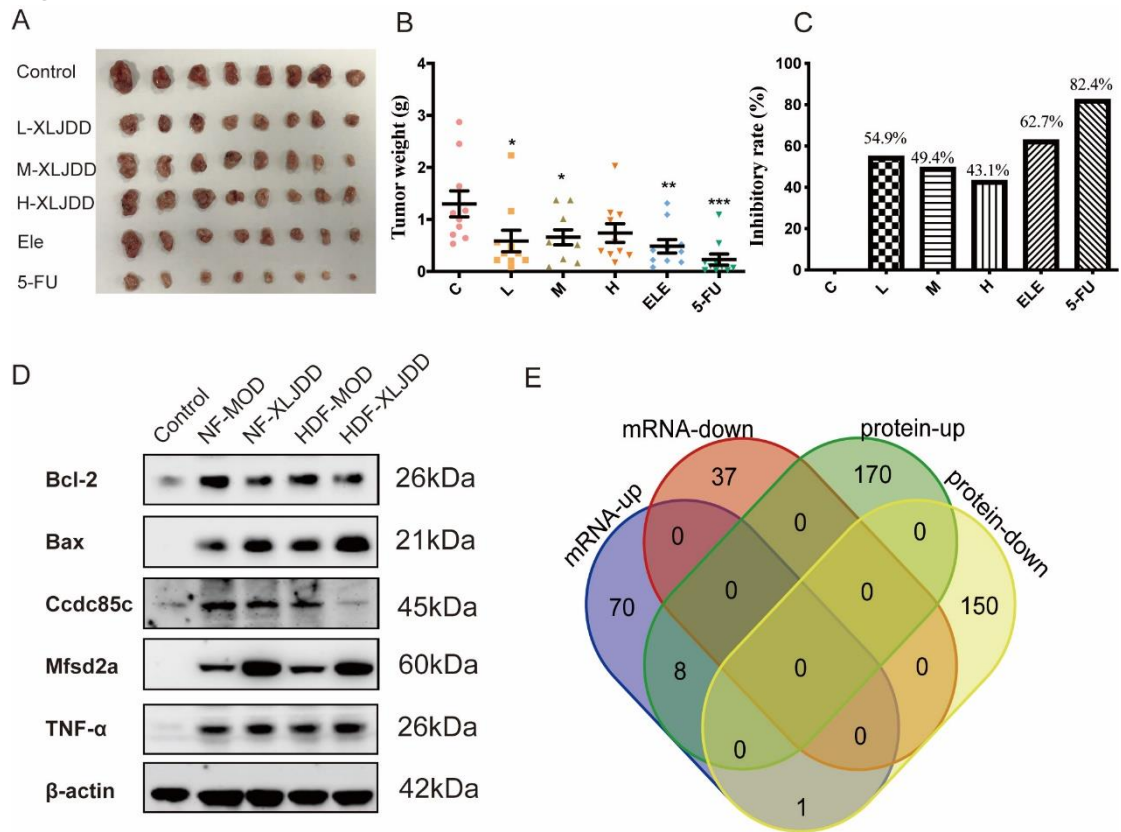

**Figure S1:** (A) The results of subcutaneous tumor formation in mice showed the effect of control group, low-concentration XLJDD group, medium-concentration XLJDD group, and high-concentration XLJDD group on tumor growth. Positive controls are elemene group and 5-FU group. (B) The comparison of tumor weight between each group and control group. \* $P < 0.05$ , \*\* $P < 0.01$ , \*\*\* $P < 0.001$ . (C) Quantification of inhibitory rate in each group. (D) The subcutaneous tumors were examined for endogenous levels of Bcl-2, Bax, Ccdc85c, Mfsd2a and TNF- $\alpha$  by western blot. (E) Venn diagram display of differential genes between proteome and transcriptome.

Table S1 NF-XLJDD\_vs\_NF-MOD.mRNA.diffgene

| gene_id            | log2FoldChange | pvalue   |
|--------------------|----------------|----------|
| ENSMUSG00000053916 | 6.550940098    | 9.37E-32 |
| ENSMUSG00000025004 | -12.7114182    | 2.97E-18 |
| ENSMUSG00000071356 | 2.314135925    | 4.42E-14 |
| ENSMUSG00000054459 | 10.62281073    | 2.17E-11 |
| ENSMUSG00000103255 | -10.26057199   | 2.78E-10 |
| ENSMUSG00000015943 | -2.51692827    | 3.37E-10 |
| ENSMUSG00000050840 | 10.45021121    | 7.44E-10 |
| ENSMUSG00000043289 | -2.941920143   | 8.18E-10 |
| ENSMUSG00000024131 | 2.440059924    | 1.06E-09 |
| ENSMUSG00000000216 | -1.589779582   | 2.59E-09 |
| ENSMUSG00000032068 | 2.270749454    | 5.99E-09 |
| ENSMUSG00000042031 | 10.80259956    | 8.85E-09 |
| ENSMUSG00000050296 | 4.917819255    | 1.20E-08 |
| ENSMUSG00000022650 | 2.864227307    | 1.69E-08 |
| ENSMUSG00000001670 | 1.411014523    | 1.97E-08 |
| ENSMUSG00000038602 | 2.107904677    | 2.45E-08 |
| ENSMUSG00000030069 | 4.194867049    | 1.05E-07 |
| ENSMUSG00000050747 | 1.304810709    | 1.16E-07 |
| ENSMUSG00000023943 | 9.71130507     | 1.84E-07 |
| ENSMUSG00000082766 | -9.380255978   | 1.86E-07 |
| ENSMUSG00000020101 | 1.522869184    | 2.00E-07 |
| ENSMUSG00000050074 | -9.558467533   | 2.03E-07 |
| ENSMUSG00000029314 | 1.733093834    | 2.34E-07 |
| ENSMUSG00000068600 | 2.956328864    | 2.45E-07 |
| ENSMUSG00000040809 | 1.592106425    | 2.75E-07 |
| ENSMUSG00000061762 | 2.075297215    | 3.98E-07 |
| ENSMUSG00000110104 | -16.50657308   | 4.34E-07 |
| ENSMUSG00000045022 | 9.545427264    | 5.23E-07 |
| ENSMUSG00000078735 | -9.593758265   | 5.31E-07 |
| ENSMUSG00000060988 | 2.756755409    | 5.58E-07 |
| ENSMUSG00000052974 | -1.811608833   | 5.61E-07 |
| ENSMUSG00000053862 | 1.979591281    | 5.85E-07 |
| ENSMUSG00000056234 | -1.282924385   | 1.26E-06 |
| ENSMUSG00000044071 | -3.017040063   | 1.28E-06 |
| ENSMUSG00000020826 | 1.460812774    | 1.71E-06 |
| ENSMUSG00000078591 | 11.53810396    | 2.14E-06 |
| ENSMUSG00000002020 | -1.44134306    | 2.44E-06 |
| ENSMUSG00000020839 | 3.665517788    | 2.45E-06 |
| ENSMUSG00000032452 | -1.796175281   | 2.64E-06 |
| ENSMUSG00000056054 | 2.002569778    | 3.30E-06 |
| ENSMUSG00000039419 | 1.471431632    | 3.43E-06 |
| ENSMUSG00000036578 | 9.045804205    | 4.13E-06 |
| ENSMUSG00000017868 | 1.548334441    | 4.46E-06 |
| ENSMUSG00000021536 | 1.807538095    | 4.94E-06 |
| ENSMUSG00000074195 | 1.465880492    | 6.46E-06 |
| ENSMUSG00000079012 | 1.477121373    | 7.78E-06 |
| ENSMUSG00000031952 | 8.772128646    | 8.99E-06 |
| ENSMUSG00000022797 | 1.323565256    | 9.15E-06 |
| ENSMUSG00000030607 | -8.731430769   | 1.09E-05 |
| ENSMUSG00000067231 | 2.606935583    | 1.23E-05 |
| ENSMUSG00000030317 | -1.727784382   | 1.29E-05 |
| ENSMUSG00000028655 | 1.302317465    | 1.29E-05 |
| ENSMUSG00000058328 | 10.54332004    | 1.37E-05 |
| ENSMUSG00000030762 | 1.589045762    | 1.45E-05 |
| ENSMUSG00000037922 | 1.356337782    | 1.57E-05 |
| ENSMUSG00000050982 | 2.152563083    | 1.61E-05 |

|                    |              |             |
|--------------------|--------------|-------------|
| ENSMUSG00000029123 | -10.59639661 | 1.81E-05    |
| ENSMUSG00000060882 | 2.29810836   | 1.89E-05    |
| ENSMUSG00000028527 | 2.665147669  | 2.77E-05    |
| ENSMUSG00000052819 | -1.076636002 | 2.96E-05    |
| ENSMUSG00000068547 | 1.784777618  | 3.00E-05    |
| ENSMUSG00000063260 | 2.75302898   | 3.34E-05    |
| ENSMUSG00000095545 | -1.418142399 | 3.42E-05    |
| ENSMUSG00000074882 | -1.272723508 | 3.66E-05    |
| ENSMUSG00000032502 | -1.146577168 | 3.70E-05    |
| XLOC_041218        | -5.564165487 | 3.74E-05    |
| ENSMUSG00000020704 | 1.280762463  | 4.38E-05    |
| ENSMUSG00000034525 | -1.326849728 | 4.70E-05    |
| ENSMUSG00000034687 | -2.116870657 | 4.76E-05    |
| ENSMUSG00000063522 | 1.557857959  | 4.79E-05    |
| ENSMUSG00000030483 | -1.55958502  | 4.86E-05    |
| ENSMUSG00000027068 | 1.370374041  | 5.27E-05    |
| ENSMUSG00000023057 | 2.21611513   | 5.45E-05    |
| ENSMUSG00000026170 | -1.178512314 | 5.54E-05    |
| ENSMUSG00000020303 | 1.368205557  | 5.83E-05    |
| ENSMUSG00000029700 | 2.23893243   | 6.33E-05    |
| ENSMUSG00000023885 | -1.198727167 | 6.49E-05    |
| ENSMUSG00000056612 | -1.885696724 | 6.72E-05    |
| ENSMUSG00000068349 | 2.848681774  | 6.76E-05    |
| ENSMUSG00000053113 | 1.307924579  | 6.92E-05    |
| ENSMUSG00000029321 | 2.01725669   | 7.07E-05    |
| ENSMUSG00000041293 | 1.094022212  | 7.30E-05    |
| ENSMUSG00000025592 | -1.802449049 | 7.51E-05    |
| ENSMUSG00000024292 | 1.736181234  | 8.22E-05    |
| ENSMUSG00000048582 | -7.953367676 | 8.46E-05    |
| ENSMUSG00000030017 | 1.148606664  | 8.69E-05    |
| ENSMUSG00000062480 | 3.277634368  | 8.72E-05    |
| ENSMUSG00000045551 | 1.882318276  | 9.03E-05    |
| ENSMUSG00000046897 | -1.482698009 | 9.73E-05    |
| ENSMUSG00000030208 | 2.434915861  | 9.81E-05    |
| ENSMUSG00000022886 | 5.700491467  | 9.85E-05    |
| ENSMUSG00000013653 | 2.104722432  | 9.92E-05    |
| XLOC_097956        | 5.092393427  | 0.000100112 |
| ENSMUSG00000079104 | 7.27444379   | 0.00011152  |
| ENSMUSG00000019888 | 1.538120419  | 0.000114232 |
| ENSMUSG00000078886 | -3.249276345 | 0.000114859 |
| ENSMUSG00000001823 | -3.92025786  | 0.000130316 |
| ENSMUSG00000074445 | -1.078881132 | 0.00013727  |
| ENSMUSG00000005800 | 1.694907367  | 0.000140014 |
| ENSMUSG00000028544 | 1.16453165   | 0.000140637 |
| ENSMUSG00000036760 | 8.22290114   | 0.000141972 |
| ENSMUSG00000000805 | 1.248651881  | 0.00015198  |
| ENSMUSG00000054619 | -1.773398289 | 0.000157178 |
| ENSMUSG00000092004 | 9.44132038   | 0.000157987 |
| ENSMUSG00000050439 | -9.484885425 | 0.000161485 |
| ENSMUSG00000028262 | 1.176433216  | 0.000162958 |
| ENSMUSG00000029361 | 1.234529299  | 0.0001876   |
| ENSMUSG00000030873 | -1.031797333 | 0.00019277  |
| ENSMUSG00000030228 | 1.448919586  | 0.000196668 |
| ENSMUSG00000050359 | 1.886233457  | 0.000219305 |
| ENSMUSG00000051079 | 1.44531597   | 0.000223167 |
| ENSMUSG00000046259 | 2.902290991  | 0.000227901 |
| ENSMUSG00000062345 | 9.383659201  | 0.000228761 |
| ENSMUSG00000030092 | 1.972121446  | 0.000229714 |

|                    |             |             |
|--------------------|-------------|-------------|
| ENSMUSG00000046688 | 1.099169895 | 0.000238818 |
| ENSMUSG00000038751 | 1.122213525 | 0.000246232 |

---

Table S2 HDF-XLJDD\_vs\_HDF-MOD.mRNA.diffgene

| gene_id            | log2FoldChange | pvalue      |
|--------------------|----------------|-------------|
| ENSMUSG00000053916 | 7.631973007    | 6.46E-15    |
| ENSMUSG00000051777 | 11.70186292    | 1.09E-13    |
| ENSMUSG00000029999 | -2.534255193   | 1.05E-09    |
| ENSMUSG00000115423 | 10.73967366    | 2.48E-08    |
| ENSMUSG00000022838 | -2.863293907   | 2.51E-08    |
| ENSMUSG00000022657 | -2.440387806   | 7.78E-08    |
| ENSMUSG00000015962 | -10.13803571   | 8.28E-08    |
| ENSMUSG00000116121 | 4.675139939    | 1.42E-07    |
| ENSMUSG00000024653 | 10.06394291    | 1.64E-07    |
| ENSMUSG00000057933 | -9.778397571   | 2.92E-07    |
| ENSMUSG00000027209 | 10.38050328    | 3.19E-07    |
| ENSMUSG00000037196 | 12.48683718    | 6.43E-07    |
| ENSMUSG00000054619 | -2.15874635    | 3.45E-06    |
| ENSMUSG00000019892 | 9.12743128     | 5.07E-06    |
| ENSMUSG00000025013 | 9.0024581      | 5.78E-06    |
| ENSMUSG00000078881 | -11.87984275   | 6.11E-06    |
| ENSMUSG00000079495 | -9.137055892   | 7.82E-06    |
| ENSMUSG00000046213 | 8.861027443    | 9.18E-06    |
| ENSMUSG00000030017 | -2.540817742   | 1.26E-05    |
| ENSMUSG00000030173 | -9.443153663   | 1.31E-05    |
| ENSMUSG00000117098 | -12.00388588   | 1.39E-05    |
| ENSMUSG00000109564 | -5.073894931   | 2.08E-05    |
| ENSMUSG00000073551 | -10.52013243   | 2.29E-05    |
| ENSMUSG00000023132 | -2.864371623   | 2.30E-05    |
| ENSMUSG00000032068 | -1.7815199     | 2.33E-05    |
| ENSMUSG00000079386 | 9.283039128    | 2.72E-05    |
| ENSMUSG00000089739 | 17.30200191    | 2.84E-05    |
| ENSMUSG00000007656 | 2.189514418    | 2.90E-05    |
| ENSMUSG00000035860 | 8.743711323    | 3.04E-05    |
| ENSMUSG00000032122 | -3.142877289   | 3.71E-05    |
| ENSMUSG00000067149 | -2.056167421   | 3.87E-05    |
| ENSMUSG00000026393 | -1.65971481    | 4.80E-05    |
| ENSMUSG00000073409 | -1.833639732   | 5.00E-05    |
| ENSMUSG00000030092 | -3.094871059   | 5.00E-05    |
| ENSMUSG00000025433 | 3.168345657    | 5.15E-05    |
| ENSMUSG00000091722 | -8.349542544   | 6.34E-05    |
| ENSMUSG00000032083 | -6.967153164   | 7.13E-05    |
| ENSMUSG00000112781 | -9.951925006   | 7.29E-05    |
| ENSMUSG00000078897 | -9.939406369   | 7.41E-05    |
| ENSMUSG00000025927 | 8.331867542    | 7.42E-05    |
| ENSMUSG00000092544 | 10.22469683    | 7.48E-05    |
| ENSMUSG00000073878 | -10.16426817   | 7.71E-05    |
| ENSMUSG00000103092 | -3.560566089   | 8.01E-05    |
| ENSMUSG00000022510 | 8.271331336    | 8.43E-05    |
| ENSMUSG00000025004 | 10.0960636     | 9.46E-05    |
| ENSMUSG00000026609 | -10.24011172   | 9.92E-05    |
| ENSMUSG00000026774 | 8.595549125    | 0.00010146  |
| ENSMUSG00000105835 | -13.37944596   | 0.000102962 |
| ENSMUSG00000092232 | 13.35540777    | 0.000122979 |
| ENSMUSG00000075015 | -9.336198196   | 0.000127801 |
| ENSMUSG00000082932 | 9.885490308    | 0.000138286 |
| ENSMUSG00000026141 | 9.240745476    | 0.000138885 |
| ENSMUSG00000091228 | 13.06219506    | 0.00015131  |
| ENSMUSG00000074771 | 3.447803177    | 0.000161931 |

Table S3 P1\_vs\_HDF-MOD.mRNA.diffgene

| gene_id            | log2FoldChange | pvalue      |
|--------------------|----------------|-------------|
| ENSMUSG00000037196 | 14.49129191    | 5.62E-28    |
| ENSMUSG00000053916 | 8.054154606    | 1.67E-13    |
| ENSMUSG00000092544 | 11.22307097    | 1.44E-09    |
| ENSMUSG00000078880 | 11.08833387    | 1.79E-09    |
| ENSMUSG00000079516 | -8.28130927    | 5.84E-09    |
| ENSMUSG00000058579 | -8.151753982   | 2.24E-08    |
| ENSMUSG00000031896 | -8.545260379   | 1.19E-07    |
| ENSMUSG00000071519 | -13.31533135   | 2.21E-07    |
| ENSMUSG00000004821 | -13.33289753   | 2.24E-07    |
| ENSMUSG00000029882 | -9.023004202   | 4.92E-07    |
| ENSMUSG00000110104 | 17.29517008    | 5.35E-07    |
| ENSMUSG00000027519 | 2.198959859    | 9.84E-07    |
| ENSMUSG00000068341 | -8.865118862   | 1.34E-06    |
| ENSMUSG00000057163 | -8.708177992   | 2.38E-06    |
| ENSMUSG00000071553 | -6.610925194   | 2.89E-06    |
| ENSMUSG00000011463 | -8.728559874   | 3.02E-06    |
| ENSMUSG00000029522 | -11.97787499   | 3.59E-06    |
| ENSMUSG00000022112 | -11.88712228   | 4.30E-06    |
| ENSMUSG00000046008 | -8.996602887   | 4.49E-06    |
| ENSMUSG00000031957 | -8.76191686    | 5.27E-06    |
| ENSMUSG00000024184 | -6.773252591   | 8.45E-06    |
| ENSMUSG00000116121 | 4.567131304    | 9.16E-06    |
| ENSMUSG00000023140 | -10.07655969   | 9.25E-06    |
| ENSMUSG00000037922 | -2.123799745   | 1.20E-05    |
| ENSMUSG00000037705 | 9.651544744    | 1.29E-05    |
| ENSMUSG00000060913 | 9.284809023    | 1.46E-05    |
| ENSMUSG00000079364 | 9.078155671    | 2.09E-05    |
| ENSMUSG00000093931 | -7.881052849   | 2.50E-05    |
| ENSMUSG00000023433 | -9.155609112   | 2.67E-05    |
| ENSMUSG00000102422 | 17.37809699    | 2.96E-05    |
| ENSMUSG00000022838 | -2.464852811   | 3.18E-05    |
| ENSMUSG00000091415 | 9.074327522    | 3.25E-05    |
| ENSMUSG00000047880 | -2.500655017   | 3.26E-05    |
| ENSMUSG00000054446 | -8.997082173   | 3.27E-05    |
| ENSMUSG00000117098 | -11.96544448   | 3.41E-05    |
| ENSMUSG00000078901 | -10.85931974   | 3.47E-05    |
| ENSMUSG00000026818 | -9.215843786   | 3.53E-05    |
| ENSMUSG00000050961 | 9.155574179    | 5.30E-05    |
| ENSMUSG00000024028 | -7.12629772    | 5.31E-05    |
| ENSMUSG00000058119 | -10.61344534   | 5.44E-05    |
| ENSMUSG00000036938 | -8.472425883   | 5.71E-05    |
| ENSMUSG00000021415 | -8.704174102   | 6.73E-05    |
| ENSMUSG00000073551 | -10.4793698    | 7.11E-05    |
| ENSMUSG00000059654 | -7.753628001   | 7.41E-05    |
| ENSMUSG00000032661 | -2.093080085   | 9.20E-05    |
| ENSMUSG00000096569 | -10.32810626   | 9.76E-05    |
| ENSMUSG00000070360 | -8.701559188   | 0.000100954 |
| ENSMUSG00000032083 | -7.763733504   | 0.000115449 |
| ENSMUSG00000108596 | 10.12769576    | 0.000115647 |
| ENSMUSG00000070594 | 10.4094334     | 0.000129267 |

Table S4 P2\_vs\_HDF-MOD.mRNA.diffgene

| gene_id            | log2FoldChange | pvalue   |
|--------------------|----------------|----------|
| ENSMUSG00000053916 | 7.916764919    | 2.58E-15 |
| ENSMUSG00000025004 | 12.84884914    | 3.95E-13 |
| ENSMUSG00000009670 | 11.72558151    | 8.68E-13 |
| ENSMUSG00000007656 | 2.430442794    | 4.22E-07 |
| ENSMUSG00000022838 | -2.10412274    | 1.06E-06 |
| ENSMUSG00000071356 | -2.835780533   | 1.28E-06 |
| ENSMUSG00000022112 | -11.87177817   | 1.99E-06 |
| ENSMUSG00000037196 | 12.00812851    | 3.09E-06 |
| ENSMUSG00000031022 | 9.157594471    | 6.03E-06 |
| ENSMUSG00000025013 | 9.221181096    | 6.32E-06 |
| ENSMUSG00000089945 | 2.537057785    | 1.14E-05 |
| ENSMUSG00000063529 | -9.036669106   | 1.60E-05 |
| ENSMUSG00000078901 | -10.84466747   | 1.76E-05 |
| ENSMUSG00000042761 | -9.012680587   | 2.01E-05 |
| ENSMUSG00000117136 | -10.9658667    | 2.23E-05 |
| ENSMUSG00000030173 | -9.387551419   | 2.36E-05 |
| ENSMUSG00000054604 | 1.687047895    | 2.56E-05 |
| ENSMUSG00000078880 | 10.83636435    | 2.83E-05 |
| ENSMUSG00000058119 | -10.59817926   | 2.89E-05 |
| ENSMUSG00000092094 | 10.81400057    | 3.37E-05 |
| ENSMUSG00000091537 | -2.078798003   | 3.64E-05 |
| ENSMUSG00000028023 | -14.91450521   | 4.62E-05 |
| ENSMUSG00000109564 | -4.788283013   | 6.78E-05 |
| ENSMUSG00000037705 | 8.286952816    | 9.41E-05 |

Table S5 P3\_vs\_HDF-MOD.mRNA.diffgene

| gene_id            | log2FoldChange | pvalue   |
|--------------------|----------------|----------|
| ENSMUSG00000037196 | 14.37438125    | 5.78E-29 |
| ENSMUSG00000023140 | -19.82103743   | 1.25E-13 |
| ENSMUSG00000079516 | -14.99660984   | 2.04E-13 |
| ENSMUSG00000105204 | 11.85547934    | 1.53E-11 |
| ENSMUSG00000068341 | -13.69899237   | 3.19E-11 |
| ENSMUSG00000092544 | 11.37551467    | 3.54E-10 |
| ENSMUSG00000031896 | -10.55812829   | 3.61E-10 |
| ENSMUSG00000096569 | -20.28296346   | 4.83E-10 |
| ENSMUSG00000096770 | -19.06677663   | 8.50E-10 |
| ENSMUSG00000058579 | -8.786212318   | 9.13E-10 |
| ENSMUSG00000029999 | -2.832661589   | 2.75E-09 |
| ENSMUSG00000040205 | -15.71604603   | 3.94E-09 |
| ENSMUSG00000054106 | -11.60231376   | 1.02E-08 |
| ENSMUSG00000029882 | -11.30391214   | 7.42E-08 |
| ENSMUSG00000036938 | -11.31183515   | 8.31E-08 |
| ENSMUSG00000092232 | 13.75477822    | 1.20E-07 |
| XLOC_041218        | 5.574881267    | 1.25E-07 |
| ENSMUSG00000071519 | -13.32841948   | 1.52E-07 |
| ENSMUSG00000004821 | -13.34612846   | 1.53E-07 |
| ENSMUSG00000024184 | -8.723991052   | 1.96E-07 |
| ENSMUSG00000023433 | -11.28466798   | 8.60E-07 |
| ENSMUSG00000006204 | -12.32156646   | 1.25E-06 |
| ENSMUSG00000011463 | -11.27777262   | 1.25E-06 |
| ENSMUSG00000029522 | -11.99081475   | 2.49E-06 |
| ENSMUSG00000022112 | -11.89951387   | 2.93E-06 |
| ENSMUSG00000046008 | -11.42008602   | 3.26E-06 |
| ENSMUSG00000057163 | -10.67399774   | 4.33E-06 |
| ENSMUSG00000054446 | -11.72487449   | 4.91E-06 |
| ENSMUSG00000031957 | -11.21910378   | 5.61E-06 |
| ENSMUSG00000071553 | -6.442415792   | 5.81E-06 |
| ENSMUSG00000026818 | -11.64125773   | 1.51E-05 |
| ENSMUSG00000067149 | -2.192456605   | 1.66E-05 |
| ENSMUSG00000092094 | 11.29050933    | 2.52E-05 |
| ENSMUSG00000071521 | -9.518015789   | 2.82E-05 |
| ENSMUSG00000093931 | -11.3607432    | 3.07E-05 |
| ENSMUSG00000062478 | -11.1098297    | 3.51E-05 |
| ENSMUSG00000078880 | 10.94312925    | 3.51E-05 |
| ENSMUSG00000059654 | -9.96911879    | 3.60E-05 |
| ENSMUSG00000058119 | -10.62588336   | 4.16E-05 |
| ENSMUSG00000022076 | -10.72956075   | 5.11E-05 |
| ENSMUSG00000028023 | -14.94226066   | 5.21E-05 |
| ENSMUSG00000073551 | -10.49196256   | 5.36E-05 |
| ENSMUSG00000102422 | 14.73653876    | 6.29E-05 |
| ENSMUSG00000074268 | -11.44723723   | 6.31E-05 |
| ENSMUSG00000070360 | -10.85910036   | 6.59E-05 |
| ENSMUSG00000109564 | -5.086085759   | 7.15E-05 |
| ENSMUSG00000051627 | 3.046188018    | 7.81E-05 |
| ENSMUSG00000030954 | -5.246641749   | 0.000108 |
| ENSMUSG00000029235 | 8.457450202    | 0.000116 |
| ENSMUSG00000023982 | 10.27030546    | 0.000124 |
| ENSMUSG00000071517 | -10.04008431   | 0.00013  |
| ENSMUSG00000105835 | -13.35134404   | 0.000149 |
| ENSMUSG00000000215 | -12.82832482   | 0.000155 |



Table S6 P4\_vs\_HDF-MOD.mRNA.diffgene

| gene_id            | log2FoldChange | pvalue   |
|--------------------|----------------|----------|
| ENSMUSG00000079362 | -14.91695906   | 2.01E-40 |
| ENSMUSG00000037196 | 13.17343563    | 1.30E-18 |
| ENSMUSG00000053916 | 8.1349543      | 2.22E-15 |
| ENSMUSG00000025004 | 12.37640438    | 3.52E-14 |
| ENSMUSG00000020419 | -10.89508723   | 9.44E-10 |
| ENSMUSG00000030017 | -3.155450163   | 2.09E-09 |
| ENSMUSG00000021541 | 10.58492443    | 1.37E-08 |
| ENSMUSG00000117081 | -16.50491958   | 1.12E-07 |
| ENSMUSG00000022838 | -2.519188566   | 1.38E-07 |
| ENSMUSG00000023132 | -3.564587981   | 7.73E-07 |
| ENSMUSG00000025991 | -3.299958762   | 8.86E-07 |
| ENSMUSG00000039539 | 12.756979      | 8.89E-07 |
| ENSMUSG00000060615 | 3.114766701    | 1.45E-06 |
| ENSMUSG00000051777 | 12.09815688    | 2.65E-06 |
| ENSMUSG00000029236 | 2.672166505    | 5.71E-06 |
| ENSMUSG00000061561 | 9.433762843    | 6.39E-06 |
| ENSMUSG00000025013 | 9.132955302    | 7.36E-06 |
| ENSMUSG00000025433 | 3.50692666     | 9.76E-06 |
| ENSMUSG00000021940 | 9.040206669    | 9.88E-06 |
| ENSMUSG00000073608 | -4.328471342   | 1.09E-05 |
| ENSMUSG00000078881 | -11.77277465   | 1.27E-05 |
| ENSMUSG00000020102 | 2.19156619     | 1.68E-05 |
| ENSMUSG00000047842 | 2.741947482    | 1.74E-05 |
| ENSMUSG00000045569 | 9.091026393    | 2.27E-05 |
| ENSMUSG00000078901 | -10.79679883   | 2.48E-05 |
| ENSMUSG00000000296 | 2.459196736    | 2.60E-05 |
| ENSMUSG00000026023 | 8.744012593    | 3.21E-05 |
| ENSMUSG00000028289 | 2.076162553    | 4.23E-05 |
| ENSMUSG00000020702 | -10.51199423   | 4.46E-05 |
| ENSMUSG00000032122 | -3.303114324   | 4.91E-05 |
| ENSMUSG00000073551 | -10.41667609   | 5.21E-05 |
| ENSMUSG00000047694 | -1.673077477   | 5.21E-05 |
| ENSMUSG00000028255 | 2.226359729    | 5.32E-05 |
| ENSMUSG00000074004 | 2.929089521    | 6.04E-05 |
| ENSMUSG00000095681 | 8.504105558    | 7.49E-05 |
| ENSMUSG00000108596 | 9.803239387    | 7.57E-05 |
| ENSMUSG00000037973 | 2.563537895    | 8.11E-05 |
| ENSMUSG00000092544 | 10.38235222    | 8.19E-05 |
| ENSMUSG00000013611 | 8.359374105    | 0.000106 |
| ENSMUSG00000054417 | 10.64715692    | 0.000111 |
| ENSMUSG00000037705 | 8.284314245    | 0.000117 |

Table S7 P5\_vs\_HDF-MOD.mRNA.diffgene

| gene_id            | log2FoldChange | pvalue   |
|--------------------|----------------|----------|
| XLOC_041218        | 6.041781914    | 1.68E-25 |
| ENSMUSG00000062170 | 11.90113115    | 1.64E-08 |
| ENSMUSG00000094083 | 10.43362108    | 1.71E-08 |
| ENSMUSG00000037196 | 14.02723703    | 3.41E-08 |
| ENSMUSG00000021541 | 10.22803229    | 5.39E-08 |
| ENSMUSG00000026934 | -11.9984487    | 5.32E-06 |
| ENSMUSG00000028255 | 2.30492077     | 6.77E-06 |
| ENSMUSG00000060615 | 2.826183025    | 9.13E-06 |
| ENSMUSG00000092094 | 11.61067203    | 1.24E-05 |
| ENSMUSG00000022935 | 3.305108886    | 1.87E-05 |
| ENSMUSG00000025433 | 3.364924961    | 1.92E-05 |
| ENSMUSG00000022262 | 2.241944683    | 3.48E-05 |
| ENSMUSG00000030173 | -9.250796744   | 3.63E-05 |
| ENSMUSG00000078880 | 10.65642317    | 3.95E-05 |
| ENSMUSG00000071679 | 10.54433668    | 5.11E-05 |
| ENSMUSG00000092004 | 10.38173178    | 6.94E-05 |
| ENSMUSG00000037705 | 8.691584732    | 8.34E-05 |

Table S8 NF-XLJDD.vs.NF-MOD.diff\_prot

| Protein    | Pvalue      | log2FC  |
|------------|-------------|---------|
| A0A075B5Q4 | 0.005992554 | -1.2576 |
| A0A075B5R0 | 0.005414268 | 1.061   |
| A0A075DCG2 | 0.034476405 | 0.70649 |
| A0A087WR50 | 0.010085183 | -0.6343 |
| A0A087WR16 | 0.000668538 | -2.5374 |
| A0A087WSB8 | 0.00364808  | 1.47934 |
| A0A087WSE3 | 0           | Inf     |
| A0A0A6YVU9 | 0.014619461 | 1.74102 |
| A0A0G2JDF7 | 0.02635486  | -0.6426 |
| A0A0G2JEG8 | 0           | Inf     |
| A0A0J9YUE9 | 0.002147474 | 0.79929 |
| A0A0R4J003 | 0.033629502 | 0.65629 |
| A0A0R4J042 | 0.013160214 | 2.2132  |
| A0A0R4J043 | 0.01593939  | 1.78205 |
| A0A0R4J0R7 | 0.007572948 | 2.42902 |
| A0A0R4J0V1 | 0.034493968 | -0.6081 |
| A0A0R4J0Z3 | 0           | Inf     |
| A0A0R4J101 | 0.000683664 | 1.43837 |
| A0A0R4J113 | 0           | Inf     |
| A0A0R4J1Y8 | 0.012639947 | -1.282  |
| A0A141CM51 | 0.015000843 | 0.69014 |
| A0A1B0GR19 | 0.049321167 | -0.7919 |
| A0A1D5RMG6 | 0.032548886 | 1.13743 |
| A0A1I7Q4G8 | 0.048626152 | -0.6722 |
| A0A1L1STZ4 | 0.018275261 | -2.7948 |
| A0A1W2P712 | 0.043671725 | -0.6612 |
| A0A1W2P712 | 0.004432204 | 0.75993 |
| A0A1Y7VKX7 | 0           | Inf     |
| A0A217FL83 | 0.016856343 | 3.58957 |
| A0A286YE36 | 0           | Inf     |
| A0A286YED2 | 0.035528379 | -1.6954 |
| A0A2R8VHF9 | 0.023308862 | 1.18253 |
| A0A2R8VI06 | 0.035260817 | -1.1582 |
| A0A338P693 | 0.001038594 | 1.02707 |
| A0A494B9V8 | 0           | Inf     |
| A0A494BBC9 | 0.020135714 | -0.9149 |
| A0A498WGR4 | 0           | Inf     |
| A0A5F8MPF3 | 0.014571659 | 2.31076 |
| A0A5F8MPK1 | 0           | Inf     |
| A0A668KLD3 | 0.012550065 | 0.68429 |
| A1L0V4     | 0.044640828 | 1.10795 |
| A1L3C0     | 0           | Inf     |
| A2A4A6     | 0.016417489 | -0.8563 |
| A2A615     | 0.00020889  | 1.21984 |
| A2A7Q5     | 0.014272541 | -1.7952 |
| A2AFG7     | 0.038807314 | 0.78424 |
| A2AGL5     | 0           | Inf     |
| A2AN37     | 0.002331467 | -1.6004 |
| A2ANX6     | 0           | Inf     |
| A2AUK7     | 0.028024175 | 0.69131 |
| A2BDN9     | 0.001568212 | -1.4183 |
| A2BDY0     | 0           | Inf     |
| A2BH40     | 0.023727854 | -0.6591 |
| A3KG93     | 0.000362366 | -0.6168 |
| A3KGR9     | 0.018054083 | -1.1911 |
| A4FUU4     | 0.049880569 | 1.48876 |

|        |             |         |
|--------|-------------|---------|
| A4GE64 | 0           | Inf     |
| A8C756 | 0.040167605 | -1.824  |
| B0QZW4 | 0           | Inf     |
| B1AR13 | 0.041941221 | 0.60201 |
| B1AVK5 | 0.032452099 | 0.97983 |
| B1AWB9 | 0.048488202 | 0.69989 |
| B1AYL1 | 0.044270206 | 0.79171 |
| B1AZQ0 | 0.008567912 | 0.9021  |
| B2RR82 | 0.018106673 | -0.6335 |
| B2RRN5 | 0.001128729 | 0.96269 |
| B2RRP1 | 0           | Inf     |
| B2RS24 | 0.039775273 | -0.8224 |
| B2RWV7 | 0.005620154 | -1.0295 |
| B2RY90 | 0.027071577 | 0.68245 |
| B7ZMW6 | 0.013276984 | 1.68491 |
| B7ZNJ6 | 0.042859262 | -1.4187 |
| B7ZNK7 | 0           | Inf     |
| B9EKG3 | 0.004910634 | -2.3891 |
| D3YTT5 | 0.011819405 | 0.7351  |
| D3YU56 | 0.008590888 | -0.9427 |
| D3YUV9 | 0.013776691 | 1.05883 |
| D3YVP0 | 0.000451708 | 2.70936 |
| D3YY02 | 0.03323546  | -1.2045 |
| D3Z0M9 | 0.038791006 | -1.0816 |
| D3Z0Z6 | 0.005102446 | -0.8722 |
| D3Z1C1 | 0.027211551 | -0.6056 |
| D3Z1C5 | 0           | Inf     |
| D3Z345 | 0.003133579 | -1.0181 |
| D3Z4S3 | 0.031578058 | -0.7414 |
| D3Z512 | 0           | Inf     |
| D3Z6T3 | 0.008658921 | -3.0833 |
| D6RG69 | 0           | Inf     |
| E9PU87 | 0.000569051 | -0.6799 |
| E9PVQ3 | 0           | Inf     |
| E9PWH2 | 0.033771152 | -0.7597 |
| E9PYK3 | 0.020478619 | 0.77014 |
| E9Q0W6 | 0.027126894 | 1.58019 |
| E9Q4Z2 | 0.04622402  | 1.22115 |
| E9Q8D7 | 0.034339071 | -0.902  |
| E9Q8Y7 | 0.004254535 | 1.75867 |
| E9QLA5 | 0.002705359 | -0.8627 |
| E9QLL2 | 0.042858539 | -0.6981 |
| E9QNL5 | 0.034321226 | 1.29306 |
| F2WWK5 | 0.02541863  | -1.4339 |
| F7BT68 | 0           | Inf     |
| F8VQM0 | 0           | Inf     |
| F8WH23 | 0.018429916 | -0.9673 |
| G3V027 | 0.019064855 | -1.5891 |
| G3X8R1 | 0.006011069 | -0.6238 |
| G3X8T9 | 0.035359754 | 0.919   |
| G3X926 | 0.013767373 | -1.1363 |
| G3X9J0 | 0.004207075 | -1.1913 |
| G3X9Y6 | 0.034124933 | 1.0305  |
| G5E895 | 0.045703152 | 0.67985 |
| H3BIX4 | 0.040992194 | 0.65062 |
| H3BJN3 | 0.038936966 | 1.09548 |
| J3QNU6 | 0.007901309 | 1.01605 |
| O08532 | 0.014080948 | 0.67867 |

|        |             |         |
|--------|-------------|---------|
| O09049 | 0.008569763 | 1.8499  |
| O09110 | 0.00058473  | -0.8515 |
| O35136 | 0.008577346 | 1.4664  |
| O35345 | 0.010690763 | -1.0016 |
| O70309 | 0.019037503 | 0.91664 |
| O70310 | 0.034882362 | -0.6683 |
| O70423 | 0.012356994 | 1.13534 |
| O70475 | 0.012370475 | 1.56728 |
| O88935 | 0.045155555 | 1.26273 |
| P00329 | 0.007892964 | -1.4706 |
| P03995 | 0.005707454 | 1.37156 |
| P04117 | 0.038416839 | 1.24917 |
| P05366 | 0.010468686 | 1.41355 |
| P10922 | 0.045174873 | 0.86074 |
| P11672 | 0.027595    | -4.6442 |
| P11725 | 0.006627995 | 1.87529 |
| P13634 | 0.029125497 | 3.45503 |
| P14069 | 0.018504328 | -0.7538 |
| P16014 | 0.0231817   | 1.08461 |
| P16015 | 0.037926512 | 2.98317 |
| P17563 | 0.002967409 | 1.4784  |
| P18872 | 0.020818236 | 0.77425 |
| P19324 | 0.01488346  | -0.6076 |
| P19788 | 0           | Inf     |
| P20664 | 0.041771684 | -0.8311 |
| P22907 | 0.039235926 | -0.7354 |
| P24547 | 0.03802451  | -0.6519 |
| P24549 | 0.030400547 | 1.38184 |
| P24815 | 0.040351285 | 1.40107 |
| P26150 | 0.046064352 | 1.20892 |
| P28651 | 0.00523353  | 1.86355 |
| P29268 | 0.036658895 | -2.0076 |
| P29416 | 0.002157588 | -0.6299 |
| P34914 | 0.001436829 | 1.11176 |
| P35230 | 0.012783761 | 3.85131 |
| P46660 | 0.048078493 | 1.02105 |
| P47867 | 0.022940374 | 1.14205 |
| P47911 | 0.046156405 | -0.6211 |
| P49452 | 0           | Inf     |
| P49817 | 0.037449627 | 0.64133 |
| P50446 | 0.0269421   | 0.96007 |
| P51658 | 0.016833685 | 0.8794  |
| P52840 | 0.033714628 | 1.35043 |
| P52875 | 0.02724025  | -0.7297 |
| P54869 | 0.005133656 | 2.03535 |
| P56388 | 0.020044886 | 1.01312 |
| P60879 | 0.045671678 | 0.7909  |
| P61793 | 0.001707018 | 0.81011 |
| P62488 | 0.030719865 | -0.5867 |
| P62823 | 0.028924633 | 1.14927 |
| P63089 | 0           | Inf     |
| P63154 | 0.045792285 | -0.702  |
| P63239 | 0.036156117 | 1.12619 |
| P70321 | 0           | Inf     |
| P70698 | 0.006672678 | -0.601  |
| P80560 | 0.039372826 | 1.34079 |
| P82347 | 0.048647076 | 0.72338 |
| P82349 | 0.018202847 | 1.06301 |

|        |             |         |
|--------|-------------|---------|
| P83741 | 0.012652495 | 1.03389 |
| P83882 | 0.035113061 | -2.7241 |
| P84309 | 0.030804632 | 0.84169 |
| P97304 | 0.047730225 | -0.6807 |
| P97350 | 0.039235112 | -1.0127 |
| P97449 | 0.012284327 | 0.64528 |
| P97452 | 0.018132415 | -0.9222 |
| P98203 | 0.038352333 | 0.60949 |
| Q05CJ7 | 0.002467196 | -1.1115 |
| Q08331 | 0.003414713 | 1.58706 |
| Q08857 | 0.017751507 | 1.24261 |
| Q0PD42 | 0.044183676 | 0.72199 |
| Q10470 | 0.004103835 | -0.6363 |
| Q148B1 | 0.003469877 | 2.42004 |
| Q1JPR8 | 0.020074156 | 1.32797 |
| Q1RME4 | 0.029925519 | 1.89088 |
| Q3TDR0 | 0.045774635 | -0.5967 |
| Q3TEL5 | 0.044517399 | -0.8246 |
| Q3TF62 | 0.012529121 | -0.6326 |
| Q3TJP6 | 0.022824488 | 0.74134 |
| Q3TL58 | 0.013417921 | -0.613  |
| Q3TQC7 | 0.012515532 | 0.884   |
| Q3TQP0 | 0.033584593 | -0.9541 |
| Q3TR90 | 0.039476249 | 0.61385 |
| Q3TSX5 | 3.44E-05    | -1.452  |
| Q3U0B3 | 0.014125192 | 0.89238 |
| Q3U3Q3 | 0.036041879 | -1.0049 |
| Q3U430 | 0.03463892  | -0.8035 |
| Q3U489 | 0.005896314 | 0.7595  |
| Q3U4A3 | 0.010638283 | -1.0561 |
| Q3UD67 | 0.025230877 | -0.6994 |
| Q3UGR5 | 0.04038493  | 0.61117 |
| Q3UIL5 | 0.002120138 | -1.1039 |
| Q3UIR2 | 0.023126125 | -0.8271 |
| Q3UJR8 | 0           | Inf     |
| Q3ULW8 | 0.013148275 | -0.6158 |
| Q3ULX3 | 0           | Inf     |
| Q3URN2 | 0.041970774 | -0.6972 |
| Q3URX8 | 0           | Inf     |
| Q3UTG5 | 0.029674422 | 1.29175 |
| Q3UW56 | 0.0040922   | 1.36061 |
| Q3UW87 | 0.016254732 | 0.85781 |
| Q3UW96 | 0           | Inf     |
| Q3UWA6 | 0.013359657 | 0.7426  |
| Q3UWQ9 | 0.006064385 | 1.20581 |
| Q3UZ39 | 0.026128183 | -0.6844 |
| Q3UZZ6 | 0.000312439 | 1.40921 |
| Q4VBD2 | 0.008197243 | 1.17929 |
| Q504M2 | 0.0446641   | -0.8293 |
| Q505B1 | 0.026055284 | -0.5867 |
| Q566I6 | 0.029315373 | -1.1865 |
| Q5BMX4 | 0.022667713 | 1.63789 |
| Q5DTL0 | 0.023737627 | 0.59508 |
| Q5GQ64 | 0.032517718 | 0.85749 |
| Q5JCT0 | 0.007657357 | 1.011   |
| Q5NC41 | 0.007590551 | 2.12721 |
| Q5SV80 | 0.02699108  | 1.09888 |
| Q5SV85 | 0.006917462 | -1.1297 |

|        |             |         |
|--------|-------------|---------|
| Q61425 | 0.003928338 | 0.67863 |
| Q61847 | 0.041128076 | 0.91784 |
| Q62383 | 0.022643531 | -0.7635 |
| Q62392 | 0           | Inf     |
| Q63810 | 0.031660508 | -1.4007 |
| Q63886 | 0.011881069 | 1.47623 |
| Q63918 | 0.030872704 | 0.84536 |
| Q64127 | 0.042192202 | -0.8304 |
| Q64299 | 0.018127714 | -0.8004 |
| Q64332 | 0.045703295 | 0.9473  |
| Q64435 | 0.018829777 | 0.97164 |
| Q64444 | 0.010615434 | 0.70774 |
| Q64471 | 0.038033213 | 0.65108 |
| Q64GA5 | 0           | Inf     |
| Q69Z38 | 0.033221388 | -0.9702 |
| Q69ZQ2 | 0.013540709 | -0.6184 |
| Q6KCD5 | 0.017616837 | 1.19818 |
| Q6NVG1 | 0.030562772 | -1.2425 |
| Q6P9N1 | 0           | Inf     |
| Q6PAC3 | 0.005257891 | -0.8068 |
| Q6PEV3 | 0.002410246 | 0.66532 |
| Q7M758 | 0.030701159 | -1.4401 |
| Q7TN05 | 0.022238185 | -0.9669 |
| Q7TSZ8 | 0.00734901  | -0.9883 |
| Q80TB8 | 0.002947689 | 2.03167 |
| Q811E7 | 0.027083399 | -0.6471 |
| Q8BGS0 | 0.006765863 | -1.2457 |
| Q8BHL7 | 0.039967648 | -0.7077 |
| Q8BJ40 | 0.005515934 | 1.97519 |
| Q8BK48 | 0.004126269 | 1.40348 |
| Q8BL86 | 0.010429625 | -1.0899 |
| Q8BNW9 | 0.000151994 | 2.77464 |
| Q8BPP1 | 0.032073028 | 0.7928  |
| Q8BUE4 | 0.010481604 | 0.95834 |
| Q8BW75 | 0.029423236 | 1.04939 |
| Q8BYZ1 | 0.032220983 | -0.7997 |
| Q8C297 | 0.036279625 | -1.1881 |
| Q8C5Y6 | 0.024081465 | 2.0608  |
| Q8CCA5 | 0.015590608 | 1.33565 |
| Q8CHQ0 | 0.005160487 | -0.5999 |
| Q8CIH5 | 0.002918582 | -1.248  |
| Q8CII2 | 0.021464428 | -0.8093 |
| Q8K0J2 | 0.001863533 | -2.1829 |
| Q8K2I3 | 0.013784658 | 1.11568 |
| Q8QZR3 | 0.002955313 | 1.38951 |
| Q8R084 | 0.009790039 | 1.23804 |
| Q8R116 | 0.012338214 | 3.28688 |
| Q8R1G2 | 0.045486505 | 0.63931 |
| Q8R1I2 | 0.046687275 | 1.64591 |
| Q8R409 | 0.000376349 | -1.0952 |
| Q8VCC1 | 0.005264389 | 1.75243 |
| Q8VCT4 | 0.005215195 | 1.51881 |
| Q8VCW8 | 0.01272237  | 1.02776 |
| Q8VD31 | 0.021058284 | -0.6104 |
| Q8VIB3 | 0.009554276 | -0.7668 |
| Q8VIM9 | 0.023966451 | -0.6115 |
| Q91V55 | 0.033872564 | -0.9116 |
| Q91V76 | 0.003414175 | 0.75529 |

|        |             |         |
|--------|-------------|---------|
| Q91WG0 | 0.00026668  | 1.36613 |
| Q91WK1 | 0.022610928 | -0.8957 |
| Q91WN1 | 0.002316767 | -0.7251 |
| Q91WU0 | 0.046402665 | 1.09738 |
| Q91XC9 | 0.018251089 | -1.6173 |
| Q920E7 | 0.038831191 | -1.305  |
| Q921H9 | 0.002778398 | -0.9386 |
| Q922R5 | 0.033706282 | -0.7715 |
| Q924H7 | 0.048488338 | -0.9493 |
| Q99J99 | 0.03993106  | 1.20936 |
| Q99JT9 | 0.01598637  | 0.76143 |
| Q99L00 | 0.042909748 | -0.7916 |
| Q99M73 | 0.007027003 | 2.30443 |
| Q9BCZ4 | 0.024474919 | -0.618  |
| Q9CR02 | 0.039645647 | -0.5886 |
| Q9CR35 | 0.040762875 | -3.1025 |
| Q9CXJ4 | 0.007290338 | 0.78619 |
| Q9CZS1 | 0.007894544 | 1.1292  |
| Q9D0I4 | 0.008418128 | 0.82759 |
| Q9D306 | 0.004322432 | 0.79541 |
| Q9D6U8 | 0.043779829 | 0.78498 |
| Q9D6Y7 | 0.011929239 | 0.6049  |
| Q9D816 | 0.04646514  | 1.48972 |
| Q9D8W7 | 0.040435949 | 1.05918 |
| Q9D939 | 0.016218694 | 1.64625 |
| Q9D952 | 0.000326692 | -1.3524 |
| Q9DBB4 | 0.041169377 | -0.9885 |
| Q9DCJ1 | 0.00073621  | -0.5922 |
| Q9DD12 | 0.019951952 | 0.84726 |
| Q9DD20 | 0.014172962 | 1.38155 |
| Q9ES74 | 0.032037377 | -0.621  |
| Q9ES83 | 0.039504351 | 1.08464 |
| Q9JI67 | 0.010868756 | 0.75519 |
| Q9JIS5 | 0.019673606 | 1.08388 |
| Q9JJ06 | 0.036902164 | 0.66925 |
| Q9JJF9 | 0.031643672 | 0.73252 |
| Q9JJY3 | 0.041435979 | -0.6553 |
| Q9QXV0 | 0.0385599   | 0.87589 |
| Q9R0P9 | 0.004552965 | 0.87605 |
| Q9R112 | 0.047450739 | 0.61164 |
| Q9R1Q8 | 0.038412524 | -0.9171 |
| Q9Z1W8 | 0           | Inf     |
| Q9Z247 | 0.014651966 | -0.6769 |
| V9GXQ2 | 0.009658956 | 7.36004 |

---



Table S9 HDF-XLJDD.vs.HDF-MOD.diff\_prot

| Protein    | P value     | log2FC  |
|------------|-------------|---------|
| A0A068BIT8 | 0.036087193 | -1.0518 |
| A0A075B5L7 | 0.005059493 | -2.0603 |
| A0A075B5P5 | 0.020203412 | -2.0559 |
| A0A075B5R5 | 0.046197768 | 1.74888 |
| A0A075B5W5 | 0           | Inf     |
| A0A087WS16 | 7.75E-05    | 4.31184 |
| A0A087WSP5 | 0.006357946 | -0.7646 |
| A0A0A0MQ89 | 0.022757131 | 0.71799 |
| A0A0A0MQA3 | 0.011899552 | -0.8817 |
| A0A0A6YWS9 | 0.015439646 | -0.7357 |
| A0A0B4J1H6 | 0.03655301  | -1.0707 |
| A0A0G2JDE8 | 0           | Inf     |
| A0A0G2JDV3 | 0.000218165 | -2.934  |
| A0A0G2JEG8 | 0.030881116 | 3.16837 |
| A0A0G2JGS0 | 0.008559785 | 0.84071 |
| A0A0J9YUJ0 | 0.005389967 | 0.62296 |
| A0A0N4SUZ0 | 0.033152341 | -0.9718 |
| A0A0R4J0H7 | 0.011522532 | 0.84314 |
| A0A0R4J0K2 | 0.015566014 | -0.5943 |
| A0A0R4J174 | 0.018211617 | 0.8911  |
| A0A0R4J190 | 0.009369807 | -1.6698 |
| A0A0R4J1Y3 | 0.019316641 | -0.7414 |
| A0A0R4J288 | 0.007066081 | -1.0589 |
| A0A140LIF8 | 0.016010804 | 2.82099 |
| A0A1B0GR19 | 0.010319248 | -1.0154 |
| A0A1C7CYU5 | 0.040835407 | -0.6017 |
| A0A1L1SQG7 | 0.03226704  | -0.6988 |
| A0A1L1STZ6 | 0.049937404 | -0.8229 |
| A0A1W2P737 | 0.012171496 | -1.1274 |
| A0A2I3BPX9 | 0.024900027 | -0.9575 |
| A0A338P6U4 | 0.039747139 | 0.79923 |
| A0A345IT93 | 0.004976305 | -0.9802 |
| A0A3B2W707 | 0.01101939  | 1.48629 |
| A0A3Q4L2Q3 | 0           | Inf     |
| A0A494BAT0 | 0.000286217 | -0.7219 |
| A0A498WGR4 | 0.036602331 | 1.22919 |
| A0A571BDP7 | 0.004912806 | -0.9371 |
| A0A5F8MPM4 | 0           | Inf     |
| A0A6B9EQU3 | 0.00041547  | -1.0007 |
| A2A559     | 0.015503573 | 0.66734 |
| A2A654     | 0           | Inf     |
| A2AA85     | 0.00028779  | 1.5105  |
| A2ABV5     | 0           | Inf     |
| A2AEB3     | 0.020452822 | 0.65154 |
| A2AEW8     | 0.032281362 | 1.37428 |
| A2ALS4     | 0.019160459 | 2.05919 |
| A2AQD5     | 0.008084219 | 1.56185 |
| A2ARA8     | 0.000414759 | 0.63695 |
| A2CF65     | 0.016114534 | -0.7857 |
| A2RRJ6     | 0.018719204 | 0.62657 |
| A2RSW6     | 0.000447244 | 1.00164 |
| A6X919     | 0.047483675 | -1.3444 |
| A7VJA4     | 0.012719632 | -0.8811 |
| A7VMS5     | 0.003055158 | -0.7773 |
| B1AVK5     | 0.020587904 | 1.18253 |
| B1AYC9     | 0.025415145 | -0.8546 |

|        |             |         |
|--------|-------------|---------|
| B2RQ80 |             | 0 Inf   |
| B2RRY4 | 0.049700004 | -1.7444 |
| B2RTL5 | 0.018316055 | 0.86968 |
| B2RY04 | 0.039427116 | 0.63539 |
| B7ZNH7 | 0.021744795 | -0.8566 |
| B7ZNK7 | 0.011909231 | 0.75739 |
| B9EJR8 | 0.006727161 | 1.1661  |
| D1MAF3 | 0.003027733 | 0.85104 |
| D3YTS1 | 0.030130982 | -0.5921 |
| D3YVU0 | 0.000534703 | -1.0014 |
| D3YVW2 | 0.02340508  | -0.7155 |
| D3YW25 |             | 0 Inf   |
| D3YZ89 |             | 0 Inf   |
| D3Z286 | 0.012854597 | 0.84125 |
| D3Z2R5 | 0.049025679 | 1.02544 |
| D3Z3X1 |             | 0 Inf   |
| D3Z5H3 | 0.036237153 | -1.2072 |
| D3Z5I1 | 0.039210511 | 1.11322 |
| D3Z5N5 | 0.004603828 | -1.9372 |
| D3Z5N6 | 0.037707946 | 1.35187 |
| D3Z600 |             | 0 Inf   |
| D3Z7C0 | 0.018213399 | 0.9943  |
| D6RFQ2 |             | 0 Inf   |
| D6RGM1 | 0.002469147 | -0.5975 |
| E9Q179 | 0.003620395 | 1.24557 |
| E9Q3Z4 |             | 0 Inf   |
| E9Q4T9 | 0.036054959 | 0.69638 |
| E9Q7N5 | 0.039255295 | 0.62834 |
| E9QLL2 | 0.007196227 | -1.096  |
| E9QNG6 | 0.000543688 | -1.0783 |
| E9QPH0 |             | 0 Inf   |
| F5BFH0 | 0.028395789 | -0.8543 |
| F6RSR4 | 0.01584504  | -0.9703 |
| F8WHU7 | 0.046065745 | 0.65296 |
| G3UZP7 | 0.001048465 | -0.8237 |
| G3X8R5 | 0.017142293 | 1.06503 |
| G3X920 | 0.021420697 | -0.7108 |
| G5E8R8 | 0.027650489 | 0.90809 |
| J3QM81 | 0.048545119 | -0.6394 |
| J7NNX8 | 0.004431833 | -2.3928 |
| J7PDL1 | 0.008500528 | -1.0574 |
| K4DI59 | 0.012783933 | -0.7194 |
| O09110 | 0.034720185 | -0.6722 |
| O19455 | 0.013346648 | -0.8398 |
| O35075 | 0.048200124 | 1.02088 |
| O35127 | 0.033474798 | 1.09529 |
| O35407 |             | 0 Inf   |
| O35621 | 0.012401471 | 1.28147 |
| O35963 | 0.009201717 | 1.01622 |
| O88653 | 0.003280079 | -1.1442 |
| O88665 |             | 0 Inf   |
| P01670 | 0.021028079 | -1.1244 |
| P02798 | 0.000460985 | 1.52623 |
| P05063 | 0.000799101 | 0.58665 |
| P0C8K7 |             | 0 Inf   |
| P10404 | 0.009934389 | -0.5944 |
| P13864 | 0.033725639 | -0.7796 |
| P14434 | 0.033318351 | -1.0407 |

|        |             |         |
|--------|-------------|---------|
| P15327 | 0.03729414  | 1.13416 |
| P22599 | 0.033371963 | -0.8141 |
| P24369 | 0.049413061 | -0.6339 |
| P30285 | 0.032540994 | 3.72443 |
| P38585 | 0.032108939 | -1.2702 |
| P39098 | 0.004331811 | -1.196  |
| P43137 | 0           | Inf     |
| P43275 | 0.049054196 | -0.7604 |
| P43276 | 0.007911445 | -0.6881 |
| P49290 | 0.032412619 | -1.8969 |
| P49452 | 0.000210645 | -2.3212 |
| P50518 | 0.018957801 | -0.5888 |
| P55065 | 0.029381156 | -0.8139 |
| P56873 | 0.027252282 | 0.6696  |
| P58468 | 0           | Inf     |
| P61327 | 0.021994061 | -0.5898 |
| P63154 | 0.000365267 | 2.34039 |
| P81122 | 0           | Inf     |
| P98203 | 0.000853781 | 1.21983 |
| Q00493 | 0.024933767 | 0.72172 |
| Q03160 | 0.046421077 | 0.89889 |
| Q03404 | 0           | Inf     |
| Q05915 | 0.045340485 | 0.61489 |
| Q059T5 | 0.027963677 | -0.8765 |
| Q06770 | 0.008845191 | -0.7513 |
| Q0P6I6 | 0.012211144 | -3.3204 |
| Q11127 | 0.044604823 | 0.71795 |
| Q14A47 | 0.010377262 | -0.9766 |
| Q14B14 | 0.037113214 | 1.68159 |
| Q2TBE6 | 0.013333477 | -2.2192 |
| Q3T9E4 | 0.003905041 | -1.6233 |
| Q3TC14 | 0.0077573   | -0.8792 |
| Q3TEE6 | 0.005751186 | -0.8816 |
| Q3TH99 | 0.012839152 | 0.6448  |
| Q3TI31 | 0.021583033 | -0.7525 |
| Q3TKR5 | 0.042208947 | -0.9369 |
| Q3TQB2 | 0.028277103 | -0.6677 |
| Q3TS44 | 0.000542123 | -0.6215 |
| Q3U011 | 0.029701196 | 0.67911 |
| Q3U0K0 | 0.012794822 | -0.7458 |
| Q3U4J6 | 0.020654983 | -1.0813 |
| Q3U671 | 0.007003085 | 2.1498  |
| Q3U7F6 | 0.01736326  | 0.63826 |
| Q3U9U5 | 0.000194331 | 1.0233  |
| Q3UGP2 | 0.00690998  | -0.7262 |
| Q3UK24 | 0.010705518 | 1.5157  |
| Q3UV38 | 0.040184744 | 0.77983 |
| Q3UV57 | 0.043738764 | -0.8806 |
| Q3UVC9 | 0           | Inf     |
| Q3UW00 | 0.025491168 | -1.0339 |
| Q3UXU8 | 0.002558278 | -1.6342 |
| Q5IRJ6 | 0.002054205 | 2.10739 |
| Q5SRC5 | 0.006949977 | 0.81178 |
| Q5SUA5 | 0.044499624 | -0.8977 |
| Q5SW46 | 0.025357188 | 1.10442 |
| Q61553 | 0.045836664 | -0.6074 |
| Q6DYE8 | 0.036958347 | -0.6469 |
| Q6NVF4 | 0.009481235 | -0.7906 |

|        |             |         |
|--------|-------------|---------|
| Q6PCM2 | 0.041026583 | -0.5917 |
| Q6PJN8 | 0.012530104 | -1.0704 |
| Q6ZWQ7 | 0.034318633 | -0.6551 |
| Q71FD5 | 0.024768113 | 1.09059 |
| Q7TSZ8 | 0.031846605 | 1.04619 |
| Q7TT52 | 0           | Inf     |
| Q80UP8 | 0           | Inf     |
| Q80YC5 | 0.033270892 | 0.80646 |
| Q80YV4 | 0.026503177 | 0.61399 |
| Q8BG07 | 0.004476957 | -0.829  |
| Q8BHL5 | 0.023216837 | -1.4882 |
| Q8BJ40 | 0.021075955 | -1.1722 |
| Q8BJW5 | 0.019736947 | -1.2712 |
| Q8BM72 | 0.02455373  | -0.8862 |
| Q8BMP1 | 0           | Inf     |
| Q8BR63 | 0.011882281 | 0.73148 |
| Q8BT51 | 0.018236098 | 1.3909  |
| Q8BTD8 | 0.001147528 | 2.02875 |
| Q8BVF2 | 0.007504909 | -1.1951 |
| Q8BYN3 | 0.009445184 | 1.03362 |
| Q8C3K0 | 0           | Inf     |
| Q8C8N0 | 0.028431307 | 1.4324  |
| Q8CEC6 | 0.021501797 | 0.6825  |
| Q8CGC6 | 0.026661119 | -0.9942 |
| Q8CIH5 | 0.033843599 | -0.5906 |
| Q8K0P3 | 0.010949663 | 1.16986 |
| Q8QZY9 | 0.010962902 | 0.9004  |
| Q8R238 | 0.015779322 | 0.62562 |
| Q8R409 | 0.005966122 | 0.7618  |
| Q8VDS4 | 0.029275735 | -1.2299 |
| Q8VEA4 | 0.005111299 | 0.65611 |
| Q91XB0 | 0.042216423 | -2.2096 |
| Q91YL7 | 0.001958401 | 0.72569 |
| Q921C5 | 0           | Inf     |
| Q921H9 | 0.045317575 | 0.6227  |
| Q923L7 | 0.000584756 | -1.4568 |
| Q924H7 | 0.016341364 | -0.7845 |
| Q99N16 | 0.005043448 | -2.9686 |
| Q9CQI9 | 0.037368214 | -1.8115 |
| Q9CR24 | 0.040157943 | 0.89573 |
| Q9CWQ0 | 0.014012629 | -0.6386 |
| Q9CYA0 | 0.026289026 | -0.6516 |
| Q9D1H6 | 0           | Inf     |
| Q9D7J4 | 0.008306098 | -0.5972 |
| Q9DBE9 | 0.02772967  | -0.5904 |
| Q9DC48 | 0.020838882 | -1.4599 |
| Q9JN6  | 0           | Inf     |
| Q9R0E1 | 0.041022458 | -0.8357 |
| Q9R1C0 | 0           | Inf     |
| Q9R1Q8 | 0.026788412 | -1.1576 |
| Q9WV34 | 0           | Inf     |
| Q9Z0E6 | 0.005720761 | -0.8744 |
| S4R2K0 | 0           | Inf     |

---

Table S10 P1.vs.HDF-MOD.diff\_prot

| Protein    | Pvalue      | log2FC      |
|------------|-------------|-------------|
| A0A075B5Y6 | 0           | Inf         |
| A0A5F8MPM4 | 0           | Inf         |
| D3Z0A5     | 0           | Inf         |
| G3UYU5     | 0           | Inf         |
| H3BJB4     | 0           | Inf         |
| Q3UVC9     | 0           | Inf         |
| Q8BHJ9     | 0           | Inf         |
| A0A0A0MQ73 | 0           | Inf         |
| A0A0G2JDE8 | 0           | Inf         |
| A0A0G2JEI9 | 0           | Inf         |
| A0A0G2JEM4 | 0           | Inf         |
| A0A0J9YUT8 | 0           | Inf         |
| A0A0R4J233 | 0           | Inf         |
| A0A0U1RNL1 | 0           | Inf         |
| A0A494BAV5 | 0           | Inf         |
| A2ATU9     | 0           | Inf         |
| D3YUS5     | 0           | Inf         |
| D3Z600     | 0           | Inf         |
| D6RFQ2     | 0           | Inf         |
| E9QMX4     | 0           | Inf         |
| Q3UKE3     | 0           | Inf         |
| Q80UP8     | 0           | Inf         |
| Q8C3K0     | 0           | Inf         |
| Q91YU8     | 0           | Inf         |
| Q9D1C3     | 0           | Inf         |
| Q9WV34     | 0           | Inf         |
| B9EJ77     | 0.01953893  | 10.48589491 |
| Q8R3P0     | 0.00137118  | 4.349870302 |
| A0A087WS16 | 0.030028794 | 4.088515381 |
| B2RSU6     | 0.03096383  | 3.525891059 |
| P30285     | 0.025567878 | 3.513527726 |
| B3VQI8     | 0.000574655 | 3.14396481  |
| A3KGF9     | 0.024614711 | 2.893266891 |
| Q3U671     | 0.009361846 | 2.374609447 |
| A0A0R4J0T0 | 0.044598693 | 1.780065567 |
| P17892     | 0.007143797 | 1.751246726 |
| B2RS09     | 0.005413742 | 1.72552153  |
| D3YWX2     | 0.03205291  | 1.639248934 |
| A0A286YED2 | 0.008387948 | 1.62626728  |
| A0A1Y7VNT1 | 0.031874169 | 1.33382536  |
| O35621     | 0.023552275 | 1.289172511 |
| O35566     | 0.039044153 | 1.278365124 |
| O88967     | 0.021113184 | 1.270430353 |
| Q14B14     | 0.034424131 | 1.256204165 |
| Q8C3X2     | 0.04393352  | 1.244145864 |
| Q3UF16     | 0.017863253 | 1.23235229  |
| A0A0R4J005 | 0.03564354  | 1.224552415 |
| Q62392     | 0.047199133 | 1.191810244 |
| D3YWJ5     | 0.049794502 | 1.184584829 |
| E9Q5D6     | 0.006830196 | 1.15787803  |
| Q05DI2     | 0.03854273  | 1.144986027 |
| E9Q179     | 0.037763651 | 1.127255168 |
| Q3TCI7     | 0.012132146 | 1.121613144 |
| Q8BI29     | 0.001503417 | 1.116868341 |
| Q8C7U1     | 0.024459592 | 1.059694748 |
| Q3U9U5     | 0.008463328 | 1.055933947 |

|            |             |              |
|------------|-------------|--------------|
| A0A0G2JFZ4 | 0.021661327 | 1.041506733  |
| Q9CQF4     | 0.001084492 | 0.946270942  |
| Q3U430     | 0.032767031 | 0.933779103  |
| B7ZWK9     | 0.032766623 | 0.889029236  |
| Q62266     | 0.032156695 | 0.881301467  |
| Q69ZX6     | 0.048264319 | 0.87782359   |
| Q9Z247     | 0.003773127 | 0.872854045  |
| E9PZJ8     | 0.027519449 | 0.869729838  |
| Q5M8M3     | 0.017797148 | 0.861637857  |
| Q03160     | 0.037667851 | 0.854948259  |
| A0A0A6YXR0 | 0.011862043 | 0.847588451  |
| Q8R0H9     | 0.034709357 | 0.846345361  |
| G5E8R8     | 0.012392544 | 0.843551221  |
| A0A1B0GRZ8 | 0.033351844 | 0.840193768  |
| B1AZ46     | 0.035239693 | 0.833240699  |
| Q9JJY4     | 0.008216365 | 0.826399094  |
| Q05CA9     | 0.044393677 | 0.809572429  |
| Q0VGU0     | 0.010245565 | 0.809424326  |
| A0A0A6YX18 | 0.034532736 | 0.807373468  |
| A5CVE4     | 0.002984212 | 0.785800765  |
| Q3UKC8     | 0.026700881 | 0.767435107  |
| Q9R0E2     | 0.01350451  | 0.761397925  |
| Q05915     | 0.023371964 | 0.755274379  |
| Q7TSZ8     | 0.046172398 | 0.748501727  |
| Q9DBK7     | 0.015206779 | 0.739763588  |
| Q61169     | 0.014400817 | 0.732917572  |
| Q812G0     | 0.042142232 | 0.727426423  |
| Q8BJF9     | 0.003532972 | 0.707650927  |
| P97377     | 0.038350154 | 0.705492912  |
| A0A0R4J138 | 0.013997719 | 0.704567293  |
| A0A0G2JH17 | 0.026914287 | 0.699713581  |
| E9Q7C1     | 0.044405383 | 0.696964323  |
| Q3TSX5     | 0.043225573 | 0.695847042  |
| D1MAF3     | 0.03056227  | 0.695146614  |
| P39098     | 0.036986839 | 0.693177735  |
| Q8CEC6     | 0.029972186 | 0.691197765  |
| A1L3C2     | 0.010558139 | 0.687385828  |
| Q8QZY9     | 0.046947799 | 0.683794307  |
| P97770     | 0.046544619 | 0.678341476  |
| Q8VE47     | 0.038503629 | 0.663814657  |
| Q8CCX9     | 0.000311322 | 0.65305286   |
| A0A0A0MQ89 | 0.025540551 | 0.636202174  |
| P12265     | 0.045248364 | 0.636061776  |
| A0A1W2P7Q1 | 0.021598824 | 0.627189532  |
| Q9EQQ9     | 0.008001319 | 0.623719656  |
| A0A0A6YWX1 | 0.040422222 | 0.616098323  |
| O09117     | 0.030527361 | 0.614658525  |
| A2AG68     | 0.041704817 | 0.614602732  |
| D3Z0Z6     | 0.04782714  | 0.610648615  |
| Q8BUR9     | 0.013583199 | 0.605078112  |
| Q3TEZ2     | 0.008136847 | 0.604556504  |
| B7ZW94     | 0.023424787 | 0.604059268  |
| P58404     | 0.035509874 | 0.594224695  |
| B2RX13     | 0.003561619 | 0.590209991  |
| Q2M4J2     | 0.037102488 | 0.589189121  |
| Q542A1     | 0.008483405 | 0.588453868  |
| D3Z2E3     | 0.027802497 | 0.586249745  |
| P11087     | 0.043213099 | -0.598585092 |

|            |             |              |
|------------|-------------|--------------|
| Q9Z0E6     | 0.018038646 | -0.602505365 |
| A6H6A9     | 0.014876234 | -0.621653217 |
| B2RQP1     | 0.00829888  | -0.628272971 |
| A0A0A0MQA3 | 0.044802947 | -0.628691066 |
| Q3TDD9     | 0.013304832 | -0.632519895 |
| A0A0R4J1R7 | 0.034878057 | -0.639087096 |
| Q5NCJ9     | 0.045494221 | -0.643461201 |
| P38585     | 0.008131097 | -0.717628681 |
| Q9D7J4     | 0.011338302 | -0.744809828 |
| Q8CFV9     | 0.019169678 | -0.749098034 |
| P63239     | 0.034065535 | -0.771623176 |
| H6WCS3     | 0.012145293 | -0.774569379 |
| Q8BYY4     | 0.017795549 | -0.778116847 |
| Q62273     | 0.045005911 | -0.790414046 |
| Q3TQB2     | 0.04151146  | -0.792086355 |
| Q8K1Z0     | 0.012197293 | -0.794065093 |
| A0A2I3BRZ2 | 0.032936503 | -0.813989342 |
| E9PXB0     | 0.00110163  | -0.81967256  |
| Q8BJW5     | 0.043628801 | -0.882786515 |
| Q8BU31     | 0.03239907  | -0.887189364 |
| O54788     | 0.013281031 | -0.902441877 |
| Q8K370     | 0.046614387 | -0.914176516 |
| E9QLL2     | 0.00350197  | -0.918177652 |
| Q8K0V4     | 0.009476535 | -0.92432839  |
| A0A494BBN2 | 0.030387167 | -0.932487316 |
| Q6P3E7     | 0.010275882 | -0.965636724 |
| A0A6B9EQU3 | 0.000603227 | -1.023592115 |
| A0A0A0MQA8 | 0.019261044 | -1.031799064 |
| P47867     | 0.049749408 | -1.049581541 |
| Q3USR8     | 0.041450359 | -1.067904787 |
| Q566C3     | 0.040012112 | -1.088503123 |
| A0A0U1RQ27 | 0.016200484 | -1.105559157 |
| K4DI59     | 0.012488431 | -1.116565779 |
| P01670     | 8.32E-05    | -1.169253735 |
| Q91VC9     | 0.005308505 | -1.182144907 |
| P12804     | 0.0491401   | -1.230708946 |
| Q549X6     | 0.01969232  | -1.239636154 |
| D3YVU0     | 0.0295558   | -1.291039094 |
| E9QNG6     | 0.00063231  | -1.294665758 |
| E9Q3Z4     | 0.041453757 | -1.302964668 |
| B2RR84     | 0.038412677 | -1.307944032 |
| P35285     | 0.027315997 | -1.369571155 |
| A0A0G2JDV3 | 0.023242695 | -1.492153247 |
| P49452     | 0.002777706 | -1.553141733 |
| Q6PCN7     | 0.004137336 | -1.648951158 |
| A2A464     | 0.007198528 | -1.767602153 |
| P52795     | 0.010635595 | -1.77164634  |
| D3Z5N5     | 0.006976174 | -1.968079104 |
| A6PWR8     | 0.000318014 | -1.996493455 |
| A0A571BG95 | 0.005844237 | -2.154921629 |
| Q80WR5     | 0.034257827 | -2.993980524 |
| Q3U1V6     | 0.025333308 | -3.123554797 |
| E9PWI3     | 0.002954658 | -3.365607298 |

Table S11 P2.vs.HDF-MOD.diff\_prot

| Protein    | Pvalue      | log2FC       |
|------------|-------------|--------------|
| A0A068BER1 | 0.024940147 | -0.722177998 |
| A0A075B5Q4 | 0.049259993 | -1.224615622 |
| A0A075B5R0 | 0 Inf       |              |
| A0A075B5R7 | 0.012093885 | -1.296950483 |
| A0A087WSN5 | 0 Inf       |              |
| A0A087WSP5 | 0.006574079 | -0.703237954 |
| A0A0G2JDV3 | 0.006005069 | -1.264460468 |
| A0A0G2JEM4 | 0 Inf       |              |
| A0A0G2JFW6 | 0.012107965 | 0.683996117  |
| A0A0H2UH13 | 0 Inf       |              |
| A0A0N4SUZ0 | 0.04154993  | -0.775382048 |
| A0A0N4SV80 | 0.007989983 | 0.740687228  |
| A0A0R4IZW7 | 0.048995552 | 1.155838216  |
| A0A0R4J0J5 | 0.008955102 | 2.692211468  |
| A0A0R4J0S7 | 0.034070326 | 0.784081734  |
| A0A0R4J117 | 0.026330737 | 0.754029251  |
| A0A0R4J1R1 | 0.016720176 | -0.919697439 |
| A0A0R4J233 | 0 Inf       |              |
| A0A140LJ04 | 0.037341528 | 0.626653509  |
| A0A140LJB8 | 0 Inf       |              |
| A0A1B0GT05 | 0.007475171 | -1.309327669 |
| A0A1S6GWI1 | 0.01218061  | -0.70717997  |
| A0A1Y7VNZ5 | 0 Inf       |              |
| A0A1Z4EAV4 | 0.049036749 | -1.023882144 |
| A0A286YCI1 | 0.043713552 | 0.81305602   |
| A0A2C9F2B5 | 0.030500312 | 1.062733972  |
| A0A2U3TZF4 | 0.038060041 | 0.764147441  |
| A0A345IT93 | 0.026639843 | -0.840314702 |
| A0A494B9V8 | 0 Inf       |              |
| A0A494BAT0 | 0.009175497 | -0.642985691 |
| A0A571BDP7 | 0.017240575 | -1.067446696 |
| A2A654     | 0.038075013 | 1.393454524  |
| A2ACQ1     | 0.03636075  | -1.304058605 |
| A2ALS4     | 0.023491554 | 1.301438835  |
| A2ARP8     | 0.002221237 | 1.100786511  |
| A2ATU9     | 0 Inf       |              |
| A3KGL9     | 0.028437489 | 1.387047663  |
| A6P3E3     | 0 Inf       |              |
| A7VMS5     | 0.007238724 | -1.050983916 |
| B0R0S4     | 0 Inf       |              |
| B1AYC9     | 0.02648104  | -0.812045254 |
| B2RS09     | 0.018426754 | 1.347963765  |
| B2RX13     | 0.040043811 | 0.710832314  |
| B2RXC6     | 0 Inf       |              |
| B2RXP1     | 0.035044241 | -0.946251533 |
| B5A5B2     | 0.046191794 | 0.94310721   |
| B8JK39     | 0.00298517  | -1.552786275 |
| D3YVS1     | 0.045106963 | 1.48643898   |
| D3YVU0     | 0.00664279  | -1.80353427  |
| D3Z3L3     | 0.01424547  | 0.953390216  |
| D3Z5H3     | 0.049642434 | -1.135729757 |
| D3Z6W7     | 0.037246775 | -0.987793516 |
| E0CZ22     | 0.048108278 | 0.676457899  |
| E9PUR6     | 0.027275021 | -0.604783232 |
| E9PV38     | 0.023526555 | 1.922299242  |
| E9PWI3     | 0.002331558 | -3.179518344 |



|        |             |              |
|--------|-------------|--------------|
| E9PXB0 | 0.0024896   | -1.012405205 |
| E9QJV4 | 0.02328331  | 1.412877255  |
| F5BFH0 | 0.000294392 | -1.161340315 |
| F7AA26 | 0.019780556 | 0.8054005    |
| G3UZP7 | 0.008606536 | -0.891933691 |
| G3X8Y8 | 0.044691101 | 0.709110575  |
| G3X975 | 0.028934815 | -0.676638509 |
| G5E874 | 0.048177314 | 2.42716897   |
| H3BKK4 | 0.02447918  | -0.908689464 |
| H3BL34 | 0 Inf       |              |
| H7BX26 | 0.01678071  | -1.080089684 |
| J7PDL1 | 0.001557397 | -1.084490085 |
| L7N260 | 0 Inf       |              |
| O09049 | 0.007100704 | 1.965157095  |
| O09117 | 0.045459428 | 0.624955999  |
| O19455 | 0.027711063 | -0.749687123 |
| O35127 | 0.030098823 | 0.973631297  |
| O35136 | 0.00801731  | -0.863331912 |
| O35604 | 0.047794638 | 1.088351922  |
| O35640 | 0.03591686  | 0.976509809  |
| O88736 | 0.020369905 | 0.664790727  |
| O88811 | 0.011676227 | 0.725573484  |
| P01654 | 0.023568876 | -1.103031571 |
| P05532 | 0.01787253  | -1.547709784 |
| P12804 | 0.033880123 | -1.049158275 |
| P17183 | 0.041942529 | -1.063160273 |
| P18181 | 0.036255482 | -1.116777668 |
| P19137 | 0.015684259 | 0.76941217   |
| P25085 | 0.027730623 | 0.862068778  |
| P47867 | 0.037610534 | -0.623726192 |
| P49135 | 0.0477347   | 1.344077472  |
| P49182 | 0.048084598 | -0.934143449 |
| P49290 | 0.04295509  | -1.551042102 |
| P52795 | 0.002289422 | -2.11594467  |
| P54728 | 0.016642663 | -0.677832545 |
| P57787 | 0.035451676 | 1.209880884  |
| P61953 | 0.042355751 | -0.648664923 |
| P63239 | 0.035849115 | -0.689358733 |
| P97350 | 0.027927817 | 0.814900119  |
| P98203 | 0.001223231 | 1.050121469  |
| Q03160 | 0.015152801 | 0.714115002  |
| Q03404 | 0 Inf       |              |
| Q2M4J2 | 0.035391401 | 1.616738106  |
| Q3T9E4 | 0.004445759 | -1.555883511 |
| Q3TBW2 | 0.048950309 | 0.669382111  |
| Q3TC14 | 0.001591139 | -0.71369087  |
| Q3TDD9 | 0.003242868 | -1.220798892 |
| Q3TI31 | 0.002380998 | -0.829850901 |
| Q3TKL5 | 0.034842115 | 0.637374718  |
| Q3TTV6 | 0.009038172 | 1.84066958   |
| Q3TWZ3 | 0 Inf       |              |
| Q3TYD6 | 0.035879613 | 1.358170866  |
| Q3U011 | 0.017267641 | 0.830080264  |
| Q3U0K0 | 0.009405684 | -1.214051954 |
| Q3U425 | 0.048967307 | 1.156625405  |
| Q3U4S0 | 0 Inf       |              |
| Q3UF16 | 0.031679501 | 1.162809053  |
| Q3UFR4 | 0.004492452 | 0.635886808  |

|        |             |              |
|--------|-------------|--------------|
| Q3UH60 | 0.02279697  | 0.849259932  |
| Q3UKE3 | 0 Inf       |              |
| Q3V2E0 | 0.04147268  | -2.810638482 |
| Q4FJU3 | 0.044321849 | 0.766032999  |
| Q566C3 | 0.028761631 | -1.11352843  |
| Q58E61 | 0.025127028 | -1.216263225 |
| Q5DTS4 | 0.027100537 | 1.411016945  |
| Q5SUA5 | 0.002465735 | -1.75331878  |
| Q61033 | 0.008231574 | 1.207858671  |
| Q61169 | 0.001768279 | 1.08015235   |
| Q61526 | 0.049460701 | 0.894472536  |
| Q61592 | 0.013665813 | 0.898881791  |
| Q6A0E5 | 0.015795544 | 0.72887842   |
| Q6NS52 | 0 Inf       |              |
| Q6P6I6 | 0.019719951 | 1.122736789  |
| Q6PJN8 | 0.039020646 | -1.379256529 |
| Q6ZQB6 | 0.041449023 | 0.610463445  |
| Q7TQ62 | 0.013239415 | 0.703303882  |
| Q80U19 | 0.023554073 | 8.407391111  |
| Q80YV4 | 4.24E-05    | 1.447695401  |
| Q80ZM5 | 0.009203019 | 1.515858582  |
| Q812G0 | 0.006476593 | 0.965868354  |
| Q8BGC0 | 0.031992484 | 2.11833416   |
| Q8BJH1 | 0.04327012  | 1.201695683  |
| Q8BJW5 | 0.019588492 | -1.248528475 |
| Q8BMQ8 | 0.020896434 | 1.184194471  |
| Q8BNU0 | 0.027952904 | 0.828987332  |
| Q8BPC1 | 0.013909636 | 0.941538969  |
| Q8BPP1 | 0.000498677 | -0.735430161 |
| Q8BU31 | 0.035909447 | -0.835259344 |
| Q8BX12 | 0.03356215  | 1.107748276  |
| Q8C3K0 | 0 Inf       |              |
| Q8CE46 | 0.011786454 | 1.998545793  |
| Q8CIH5 | 0.027581908 | -0.724344419 |
| Q8R3H6 | 0.02793457  | -1.01919882  |
| Q8VCD5 | 0.04771791  | 2.043495844  |
| Q8VCL2 | 0 Inf       |              |
| Q8VCT4 | 0.042023873 | -0.880553903 |
| Q91WC9 | 0.002258531 | 0.992877722  |
| Q91WK1 | 0.040144191 | 0.718513386  |
| Q921C5 | 0 Inf       |              |
| Q922U1 | 0.041279518 | 1.665590511  |
| Q923L7 | 0.011745919 | -1.424857442 |
| Q9CQW0 | 0.005420913 | 0.938469162  |
| Q9CR13 | 0.008301977 | -0.77853347  |
| Q9CYA0 | 0.037110974 | -0.70328644  |
| Q9D3W4 | 0.021686241 | 1.724906772  |
| Q9D787 | 0.032492675 | 1.697939726  |
| Q9D811 | 0.020878242 | -0.785723767 |
| Q9D8Q8 | 0.048825462 | 0.701075226  |
| Q9DBL2 | 0.002771388 | 1.197610636  |
| Q9DC48 | 0.011963873 | -1.859485059 |
| Q9ES52 | 0.02862199  | -1.473409582 |
| Q9R1C0 | 0 Inf       |              |
| S4R2K0 | 0 Inf       |              |

---

Table S12 P3.vs.HDF-MOD.diff\_prot

| Protein    | Pvalue      | log2FC       |
|------------|-------------|--------------|
| A0A068BER1 | 0.024940147 | -0.722177998 |
| A0A075B5Q4 | 0.049259993 | -1.224615622 |
| A0A075B5R0 | 0 Inf       |              |
| A0A075B5R7 | 0.012093885 | -1.296950483 |
| A0A087WSN5 | 0 Inf       |              |
| A0A087WSP5 | 0.006574079 | -0.703237954 |
| A0A0G2JDV3 | 0.006005069 | -1.264460468 |
| A0A0G2JEM4 | 0 Inf       |              |
| A0A0G2JFW6 | 0.012107965 | 0.683996117  |
| A0A0H2UH13 | 0 Inf       |              |
| A0A0N4SUZ0 | 0.04154993  | -0.775382048 |
| A0A0N4SV80 | 0.007989983 | 0.740687228  |
| A0A0R4IZW7 | 0.048995552 | 1.155838216  |
| A0A0R4J0J5 | 0.008955102 | 2.692211468  |
| A0A0R4J0S7 | 0.034070326 | 0.784081734  |
| A0A0R4J117 | 0.026330737 | 0.754029251  |
| A0A0R4J1R1 | 0.016720176 | -0.919697439 |
| A0A0R4J233 | 0 Inf       |              |
| A0A140LJ04 | 0.037341528 | 0.626653509  |
| A0A140LJB8 | 0 Inf       |              |
| A0A1B0GT05 | 0.007475171 | -1.309327669 |
| A0A1S6GWI1 | 0.01218061  | -0.70717997  |
| A0A1Y7VNZ5 | 0 Inf       |              |
| A0A1Z4EAV4 | 0.049036749 | -1.023882144 |
| A0A286YCI1 | 0.043713552 | 0.81305602   |
| A0A2C9F2B5 | 0.030500312 | 1.062733972  |
| A0A2U3TZF4 | 0.038060041 | 0.764147441  |
| A0A345IT93 | 0.026639843 | -0.840314702 |
| A0A494B9V8 | 0 Inf       |              |
| A0A494BAT0 | 0.009175497 | -0.642985691 |
| A0A571BDP7 | 0.017240575 | -1.067446696 |
| A2A654     | 0.038075013 | 1.393454524  |
| A2ACQ1     | 0.03636075  | -1.304058605 |
| A2ALS4     | 0.023491554 | 1.301438835  |
| A2ARP8     | 0.002221237 | 1.100786511  |
| A2ATU9     | 0 Inf       |              |
| A3KGL9     | 0.028437489 | 1.387047663  |
| A6P3E3     | 0 Inf       |              |
| A7VMS5     | 0.007238724 | -1.050983916 |
| B0R0S4     | 0 Inf       |              |
| B1AYC9     | 0.02648104  | -0.812045254 |
| B2RS09     | 0.018426754 | 1.347963765  |
| B2RX13     | 0.040043811 | 0.710832314  |
| B2RXC6     | 0 Inf       |              |
| B2RXP1     | 0.035044241 | -0.946251533 |
| B5A5B2     | 0.046191794 | 0.94310721   |
| B8JK39     | 0.00298517  | -1.552786275 |
| D3YVS1     | 0.045106963 | 1.48643898   |
| D3YVU0     | 0.00664279  | -1.80353427  |
| D3Z3L3     | 0.01424547  | 0.953390216  |
| D3Z5H3     | 0.049642434 | -1.135729757 |
| D3Z6W7     | 0.037246775 | -0.987793516 |
| E0CZ22     | 0.048108278 | 0.676457899  |
| E9PUR6     | 0.027275021 | -0.604783232 |
| E9PV38     | 0.023526555 | 1.922299242  |
| E9PWI3     | 0.002331558 | -3.179518344 |

|        |             |              |
|--------|-------------|--------------|
| E9PXB0 | 0.0024896   | -1.012405205 |
| E9QJV4 | 0.02328331  | 1.412877255  |
| F5BFH0 | 0.000294392 | -1.161340315 |
| F7AA26 | 0.019780556 | 0.8054005    |
| G3UZP7 | 0.008606536 | -0.891933691 |
| G3X8Y8 | 0.044691101 | 0.709110575  |
| G3X975 | 0.028934815 | -0.676638509 |
| G5E874 | 0.048177314 | 2.42716897   |
| H3BKK4 | 0.02447918  | -0.908689464 |
| H3BL34 | 0           | Inf          |
| H7BX26 | 0.01678071  | -1.080089684 |
| J7PDL1 | 0.001557397 | -1.084490085 |
| L7N260 | 0           | Inf          |
| O09049 | 0.007100704 | 1.965157095  |
| O09117 | 0.045459428 | 0.624955999  |
| O19455 | 0.027711063 | -0.749687123 |
| O35127 | 0.030098823 | 0.973631297  |
| O35136 | 0.00801731  | -0.863331912 |
| O35604 | 0.047794638 | 1.088351922  |
| O35640 | 0.03591686  | 0.976509809  |
| O88736 | 0.020369905 | 0.664790727  |
| O88811 | 0.011676227 | 0.725573484  |
| P01654 | 0.023568876 | -1.103031571 |
| P05532 | 0.01787253  | -1.547709784 |
| P12804 | 0.033880123 | -1.049158275 |
| P17183 | 0.041942529 | -1.063160273 |
| P18181 | 0.036255482 | -1.116777668 |
| P19137 | 0.015684259 | 0.76941217   |
| P25085 | 0.027730623 | 0.862068778  |
| P47867 | 0.037610534 | -0.623726192 |
| P49135 | 0.0477347   | 1.344077472  |
| P49182 | 0.048084598 | -0.934143449 |
| P49290 | 0.04295509  | -1.551042102 |
| P52795 | 0.002289422 | -2.11594467  |
| P54728 | 0.016642663 | -0.677832545 |
| P57787 | 0.035451676 | 1.209880884  |
| P61953 | 0.042355751 | -0.648664923 |
| P63239 | 0.035849115 | -0.689358733 |
| P97350 | 0.027927817 | 0.814900119  |
| P98203 | 0.001223231 | 1.050121469  |
| Q03160 | 0.015152801 | 0.714115002  |
| Q03404 | 0           | Inf          |
| Q2M4J2 | 0.035391401 | 1.616738106  |
| Q3T9E4 | 0.004445759 | -1.555883511 |
| Q3TBW2 | 0.048950309 | 0.669382111  |
| Q3TC14 | 0.001591139 | -0.71369087  |
| Q3TDD9 | 0.003242868 | -1.220798892 |
| Q3TI31 | 0.002380998 | -0.829850901 |
| Q3TKL5 | 0.034842115 | 0.637374718  |
| Q3TTV6 | 0.009038172 | 1.84066958   |
| Q3TWZ3 | 0           | Inf          |
| Q3TYD6 | 0.035879613 | 1.358170866  |
| Q3U011 | 0.017267641 | 0.830080264  |
| Q3U0K0 | 0.009405684 | -1.214051954 |
| Q3U425 | 0.048967307 | 1.156625405  |
| Q3U4S0 | 0           | Inf          |
| Q3UF16 | 0.031679501 | 1.162809053  |
| Q3UFR4 | 0.004492452 | 0.635886808  |

|        |             |              |
|--------|-------------|--------------|
| Q3UH60 | 0.02279697  | 0.849259932  |
| Q3UKE3 | 0 Inf       |              |
| Q3V2E0 | 0.04147268  | -2.810638482 |
| Q4FJU3 | 0.044321849 | 0.766032999  |
| Q566C3 | 0.028761631 | -1.11352843  |
| Q58E61 | 0.025127028 | -1.216263225 |
| Q5DTS4 | 0.027100537 | 1.411016945  |
| Q5SUA5 | 0.002465735 | -1.75331878  |
| Q61033 | 0.008231574 | 1.207858671  |
| Q61169 | 0.001768279 | 1.08015235   |
| Q61526 | 0.049460701 | 0.894472536  |
| Q61592 | 0.013665813 | 0.898881791  |
| Q6A0E5 | 0.015795544 | 0.72887842   |
| Q6NS52 | 0 Inf       |              |
| Q6P6I6 | 0.019719951 | 1.122736789  |
| Q6PJN8 | 0.039020646 | -1.379256529 |
| Q6ZQB6 | 0.041449023 | 0.610463445  |
| Q7TQ62 | 0.013239415 | 0.703303882  |
| Q80U19 | 0.023554073 | 8.407391111  |
| Q80YV4 | 4.24E-05    | 1.447695401  |
| Q80ZM5 | 0.009203019 | 1.515858582  |
| Q812G0 | 0.006476593 | 0.965868354  |
| Q8BGC0 | 0.031992484 | 2.11833416   |
| Q8BJH1 | 0.04327012  | 1.201695683  |
| Q8BJW5 | 0.019588492 | -1.248528475 |
| Q8BMQ8 | 0.020896434 | 1.184194471  |
| Q8BNU0 | 0.027952904 | 0.828987332  |
| Q8BPC1 | 0.013909636 | 0.941538969  |
| Q8BPP1 | 0.000498677 | -0.735430161 |
| Q8BU31 | 0.035909447 | -0.835259344 |
| Q8BX12 | 0.03356215  | 1.107748276  |
| Q8C3K0 | 0 Inf       |              |
| Q8CE46 | 0.011786454 | 1.998545793  |
| Q8CIH5 | 0.027581908 | -0.724344419 |
| Q8R3H6 | 0.02793457  | -1.01919882  |
| Q8VCD5 | 0.04771791  | 2.043495844  |
| Q8VCL2 | 0 Inf       |              |
| Q8VCT4 | 0.042023873 | -0.880553903 |
| Q91WC9 | 0.002258531 | 0.992877722  |
| Q91WK1 | 0.040144191 | 0.718513386  |
| Q921C5 | 0 Inf       |              |
| Q922U1 | 0.041279518 | 1.665590511  |
| Q923L7 | 0.011745919 | -1.424857442 |
| Q9CQW0 | 0.005420913 | 0.938469162  |
| Q9CR13 | 0.008301977 | -0.77853347  |
| Q9CYA0 | 0.037110974 | -0.70328644  |
| Q9D3W4 | 0.021686241 | 1.724906772  |
| Q9D787 | 0.032492675 | 1.697939726  |
| Q9D811 | 0.020878242 | -0.785723767 |
| Q9D8Q8 | 0.048825462 | 0.701075226  |
| Q9DBL2 | 0.002771388 | 1.197610636  |
| Q9DC48 | 0.011963873 | -1.859485059 |
| Q9ES52 | 0.02862199  | -1.473409582 |
| Q9R1C0 | 0 Inf       |              |
| S4R2K0 | 0 Inf       |              |

---

Table S13 P4.vs.HDF-MOD.diff\_prot

| Protein    | Pvalue      | log2FC       |
|------------|-------------|--------------|
| A0A075B5L7 | 0.006724791 | -1.978834708 |
| A0A075B5R0 | 0           | Inf          |
| A0A075B5W5 | 0           | Inf          |
| A0A075B677 | 0.039171728 | 1.371538989  |
| A0A087WPF5 | 0.009330016 | 0.685291046  |
| A0A0A0MQC6 | 0.020600237 | -0.898746369 |
| A0A0A6YWS9 | 0.011402934 | -0.872250694 |
| A0A0A6YX40 | 0.00357583  | 1.044941484  |
| A0A0G2JDE8 | 0           | Inf          |
| A0A0G2JDH8 | 0.016799327 | -0.846533868 |
| A0A0G2JDV3 | 0.022680836 | -0.600000544 |
| A0A0G2JEM4 | 0           | Inf          |
| A0A0G2JFW6 | 0.035109414 | 0.91226372   |
| A0A0J9YUT8 | 0           | Inf          |
| A0A0R4J0K2 | 0.017037459 | 0.62623036   |
| A0A0R4J0S7 | 0.008911405 | 1.192483525  |
| A0A0R4J1R1 | 0.045492089 | -0.765250555 |
| A0A0R4J1Y3 | 0.026603486 | -0.660776904 |
| A0A0R4J233 | 0           | Inf          |
| A0A0U1RNL1 | 0           | Inf          |
| A0A0U1RQ27 | 0.032639229 | -0.602028083 |
| A0A140LHU0 | 0.022438267 | 0.690206393  |
| A0A140LJ04 | 0.009899219 | 0.657276485  |
| A0A141CM51 | 0.018276723 | -0.590653855 |
| A0A1B0GRJ5 | 0.026856233 | -0.626692575 |
| A0A1B0GS08 | 0.045105187 | -1.078447669 |
| A0A1B0GT05 | 0.038934643 | -0.8585075   |
| A0A1D5RLZ8 | 0.043848802 | -0.594997175 |
| A0A1L1SVG6 | 0.041220599 | 0.697726981  |
| A0A1W2P8A8 | 0.037733911 | 0.79797733   |
| A0A1Z4EAV4 | 0.003958321 | -2.059280233 |
| A0A286YCI1 | 0.010559891 | 0.756236729  |
| A0A2I3BQ91 | 0           | Inf          |
| A0A2I3BRZ2 | 0.032553547 | -0.974013479 |
| A0A2R8VI06 | 0.045350778 | 0.939418205  |
| A0A338P693 | 0.001959458 | -1.343052486 |
| A0A571BG95 | 0.006095702 | -2.576816718 |
| A0A5F8MPH5 | 0.042707326 | -1.036333149 |
| A0A5F8MPX8 | 0.004895883 | 0.77616248   |
| A1L013     | 0           | Inf          |
| A2A4A6     | 0.02638678  | 0.909094298  |
| A2A615     | 0.002723202 | -1.286112583 |
| A2A654     | 0.034695877 | 1.412787597  |
| A2A7Q5     | 0.005026539 | 1.520334058  |
| A2AEB3     | 0.00356159  | 1.23823076   |
| A2AFG7     | 0.039234265 | -0.759250307 |
| A2AJK6     | 0.00709983  | 2.414322721  |
| A2ANY6     | 0.004854397 | 1.011267045  |
| A2BI31     | 0.003160519 | -0.946149811 |
| A2RRJ6     | 0.004923201 | 0.691502698  |
| A4FUU4     | 0           | Inf          |
| A4QPD3     | 0           | Inf          |
| A7VMS5     | 0.006371371 | -1.116709001 |
| B1AQ75     | 0.0370373   | -0.764663955 |
| B1AZQ0     | 0.019252457 | -0.866725067 |
| B2RS09     | 0.011914576 | 1.476446833  |

|        |             |              |
|--------|-------------|--------------|
| B7STB7 | 0.038524326 | 0.702174225  |
| B7ZCA9 | 0.046009356 | 0.65358595   |
| B7ZNR0 | 0.00094852  | 0.89343043   |
| B7ZW94 | 0.035536058 | 0.932053311  |
| B8JK39 | 0.005054362 | -1.59458514  |
| B9EKB3 | 0.044089821 | 0.641087804  |
| B9EKI3 | 0.0014445   | -1.635123029 |
| D3YTU2 | 0.022472542 | -0.924931777 |
| D3YU60 | 0.022467733 | -1.017436868 |
| D3YUE7 | 0.040398647 | 0.608712941  |
| D3YVU0 | 7.74E-05    | -1.65135386  |
| D3YWS7 | 0.022336444 | -1.046602486 |
| D3YX85 | 0.043823947 | 0.688178253  |
| D3YY50 | 0.02385265  | 0.897674087  |
| D3Z2R5 | 0.041602458 | 0.622718506  |
| D3Z3L3 | 0.006439179 | 0.998044164  |
| D3Z600 | 0 Inf       |              |
| D3Z6T3 | 0.041499786 | 0.980452971  |
| D3Z794 | 0.026965363 | 1.119943455  |
| E0CZ42 | 0.043047643 | -1.610741121 |
| E9PV38 | 0.024403789 | 2.053304528  |
| E9PWK7 | 0.033946535 | 0.737991904  |
| E9PXB0 | 0.001041097 | -1.285286322 |
| E9PXI0 | 0.019443821 | 0.748636772  |
| E9PZI9 | 0.034861237 | -0.594768623 |
| E9Q0W8 | 0.034135782 | 0.938421783  |
| E9Q634 | 0.012842913 | 0.614709025  |
| E9Q8A3 | 0.033008745 | -0.765149889 |
| F6UP77 | 0.010773868 | 0.589503598  |
| F6YRW4 | 0.037789792 | 1.170264241  |
| F7AA26 | 0.002648757 | 0.75655307   |
| F7BT68 | 0 Inf       |              |
| F8WGD2 | 0 Inf       |              |
| F8WGM5 | 0.012920929 | 0.857797406  |
| G3X8T2 | 0.030529757 | 0.696699533  |
| G3X963 | 0.00382612  | 0.875228743  |
| G5E898 | 0.016257807 | 0.823789589  |
| J7NNX8 | 0.028963135 | -0.83982599  |
| O08582 | 0.018988536 | 0.639991473  |
| O08796 | 0.020917241 | 0.711675147  |
| O08832 | 0.008279288 | -0.737662486 |
| O35136 | 0.002948165 | -1.405140682 |
| O35218 | 0.046996872 | 0.646082612  |
| O35604 | 0.049286742 | 1.081577477  |
| O35621 | 0.010613545 | 1.525776057  |
| O35639 | 0.004083475 | 0.707166173  |
| O35640 | 0.040061533 | 1.467267239  |
| O54983 | 0.016959778 | 0.967129557  |
| O70475 | 0.044962746 | -1.025483935 |
| O88307 | 0.038170843 | 0.593174206  |
| O88312 | 0.008947734 | -0.901598871 |
| O88736 | 0.004616008 | 1.071639458  |
| O88811 | 0.008054385 | 1.082474167  |
| O88879 | 0.020345593 | 0.916313359  |
| P00848 | 0.040999868 | -0.876147179 |
| P01654 | 0.049590802 | -0.811128713 |
| P05532 | 0.003199226 | -1.880304155 |
| P11725 | 0.025114038 | -1.351359484 |

|        |             |              |
|--------|-------------|--------------|
| P12804 | 0.011229275 | -1.481848864 |
| P15105 | 0.018803272 | 0.772369152  |
| P20060 | 0.028197979 | 1.024683524  |
| P20065 | 0.005764642 | 0.78996297   |
| P21956 | 0.03018994  | 0.924864662  |
| P23906 | 0.028804568 | 0.666159296  |
| P24549 | 0.039045744 | -1.121633329 |
| P24815 | 0.006135741 | -2.21341565  |
| P25085 | 0.022123724 | 1.221723106  |
| P26150 | 0.011911459 | -2.009098117 |
| P28658 | 0.037272666 | 0.593570137  |
| P29416 | 0.020449246 | 0.710123657  |
| P39098 | 0.003979847 | -1.058892221 |
| P39429 | 0.043728714 | 1.046368909  |
| P47738 | 0.043277189 | 0.707365226  |
| P48962 | 0.018325717 | -0.601023397 |
| P50446 | 0.027747623 | -0.734969737 |
| P52795 | 0.002444619 | -2.180641222 |
| P54869 | 0.000425666 | -2.570387595 |
| P55772 | 0.01872974  | 0.59016202   |
| P63166 | 0.038106708 | 0.636161342  |
| P63239 | 0.023831006 | -0.928260798 |
| P97350 | 0.039514259 | 1.344798169  |
| P98203 | 0.03285323  | 0.985936898  |
| Q03160 | 0.004183447 | 1.006600726  |
| Q059T5 | 0.012106936 | -1.328515405 |
| Q05A75 | 0.035319814 | -1.071424887 |
| Q0PD23 | 0.010341382 | 0.86114933   |
| Q148B1 | 0.001317731 | -2.799405383 |
| Q32MS5 | 0.033627317 | -0.860912395 |
| Q3T9E4 | 0.049154172 | -0.71874795  |
| Q3T9H8 | 0.020460454 | 0.842005101  |
| Q3TCW3 | 0.039050654 | -0.741439386 |
| Q3TDD9 | 0.014310649 | -0.833519497 |
| Q3TLP5 | 0.008251343 | 1.826383926  |
| Q3TWZ3 | 0 Inf       |              |
| Q3TYD6 | 0.03572451  | 1.142457636  |
| Q3U0P5 | 0.010566636 | -0.803637252 |
| Q3U3C2 | 0.010672759 | 1.054050507  |
| Q3U425 | 0.027321906 | 1.100529546  |
| Q3U430 | 0.01972725  | 2.099939215  |
| Q3U4N2 | 0.029056904 | -1.990008838 |
| Q3U4S0 | 0 Inf       |              |
| Q3U536 | 0.011658059 | 0.625265786  |
| Q3U816 | 0.048772093 | 0.702985397  |
| Q3UGR5 | 0.041076316 | -0.727112739 |
| Q3UH60 | 0.000761037 | 0.590583585  |
| Q3UH70 | 0.037540467 | 0.781993282  |
| Q3USF0 | 0 Inf       |              |
| Q3UWQ9 | 0.004208672 | -1.364158511 |
| Q3UXU8 | 0.006250407 | -1.860825808 |
| Q3UZZ6 | 0.007182661 | -1.153797351 |
| Q504M2 | 0.046530463 | 0.928760053  |
| Q546X9 | 0.032959371 | 1.224688073  |
| Q549X6 | 0.002367131 | -1.842625133 |
| Q566C3 | 0.007834796 | -1.849528913 |
| Q5DTX1 | 0.017230335 | -2.985237519 |
| Q5F1Z8 | 0.018186524 | 0.706236689  |



|        |             |              |
|--------|-------------|--------------|
| Q5JCT0 | 0.002560786 | -1.430365766 |
| Q60GT3 | 0.016162582 | -0.7482124   |
| Q61169 | 0.008626006 | 1.26263092   |
| Q61469 | 0.039270028 | -0.651201277 |
| Q66JR8 | 0.039570979 | 0.662332799  |
| Q6A0D0 | 0.048438075 | 1.499050297  |
| Q6P549 | 0.046995475 | -1.566806755 |
| Q6PCN7 | 0.005561214 | -1.750744468 |
| Q6ZQB6 | 0.013986946 | 0.659428977  |
| Q7M759 | 0.00849139  | -0.638775474 |
| Q80VA0 | 0.007732464 | -0.593336549 |
| Q80WR5 | 0.041244708 | -2.390244449 |
| Q80YQ8 | 0.032665004 | 2.242530965  |
| Q80YV4 | 0.045871198 | 1.031500295  |
| Q80Z19 | 0.011622575 | -0.700921632 |
| Q810S1 | 0 Inf       |              |
| Q8BFR4 | 0.026005427 | 0.635131291  |
| Q8BG48 | 0.035548742 | 2.03266048   |
| Q8BH01 | 0 Inf       |              |
| Q8BHJ6 | 0.038928556 | 0.616579502  |
| Q8BJW5 | 0.034512717 | -1.07164957  |
| Q8BMP1 | 0 Inf       |              |
| Q8BMQ8 | 0.019657396 | 1.715762223  |
| Q8BUR9 | 0.024348446 | 0.586251344  |
| Q8BX12 | 0.028751257 | 0.950664307  |
| Q8BXA5 | 0.029886934 | -0.76439394  |
| Q8BYW1 | 0.01692013  | 1.365742932  |
| Q8BZ33 | 0.000208827 | 0.957113146  |
| Q8C108 | 0.019493668 | 0.985860992  |
| Q8C7S2 | 0.027354617 | 0.598617502  |
| Q8CCA5 | 0 Inf       |              |
| Q8CE46 | 0.009847436 | 1.92649781   |
| Q8CEC6 | 0.048710433 | 0.926720369  |
| Q8CEW9 | 0.041050416 | 0.687356787  |
| Q8CF89 | 5.42E-05    | 2.474568664  |
| Q8CFV9 | 0.016965931 | -0.755179086 |
| Q8CI78 | 0.033989386 | 0.808901725  |
| Q8QZY6 | 0.019323531 | 0.842650469  |
| Q8R084 | 0.011711808 | -1.153551345 |
| Q8R0K2 | 0.007992403 | 0.768506587  |
| Q8R0Y6 | 0.027529186 | 0.995402896  |
| Q8R238 | 0.000144136 | 0.682773591  |
| Q8R2Y0 | 0.000164802 | -0.75891476  |
| Q8R3P0 | 0.001587416 | 4.667380201  |
| Q8R4U7 | 0.000935063 | -1.981479078 |
| Q8VCC1 | 0.008228949 | -1.200866599 |
| Q8VCL2 | 0 Inf       |              |
| Q8VCW8 | 0.002739465 | -1.054966078 |
| Q8VDD8 | 0.042582453 | 0.607388058  |
| Q8VHK1 | 0 Inf       |              |
| Q91VJ1 | 0.037526776 | 0.713668443  |
| Q91VW5 | 0.005541609 | 0.684898338  |
| Q91WC9 | 0.004482046 | 1.117942223  |
| Q91WU0 | 0.018237025 | -1.262589026 |
| Q91YU8 | 0 Inf       |              |
| Q921K8 | 0.000453148 | 0.980130704  |
| Q99J99 | 0.03598237  | -0.949238637 |
| Q99KG5 | 0.048483878 | 1.066541216  |

|        |             |              |
|--------|-------------|--------------|
| Q99LR1 | 0.039803743 | 0.696613914  |
| Q99M31 | 0.016680298 | 0.736265723  |
| Q99MP8 | 0.010289459 | 0.670832033  |
| Q99N16 | 0.020077904 | -1.323537227 |
| Q9CR60 | 0.038929245 | -0.857954857 |
| Q9CWS0 | 0.004249435 | -0.936047217 |
| Q9CYT6 | 0.001146521 | 1.673959873  |
| Q9CZB9 | 0           | Inf          |
| Q9CZS1 | 0.049016003 | -0.726912955 |
| Q9D1G3 | 0.044431043 | -1.940468724 |
| Q9D2X6 | 0.044696614 | 1.521256376  |
| Q9D6U8 | 0.00119934  | -0.704729259 |
| Q9D787 | 0.016709045 | 1.929595619  |
| Q9D8W7 | 0.028472251 | -1.02306601  |
| Q9DC07 | 0           | Inf          |
| Q9DC48 | 0.018526665 | -1.885056572 |
| Q9DD20 | 0.025986996 | -1.336579601 |
| Q9EQQ9 | 0.006464203 | 0.587321044  |
| Q9EST1 | 0.047012619 | 1.751395033  |
| Q9JI67 | 0.049097707 | -1.014900537 |
| Q9JJ06 | 0.001023617 | -0.819018144 |
| Q9JJC6 | 0.017154245 | 1.838506423  |
| Q9JJK7 | 0.040564985 | 0.853110196  |
| Q9QY23 | 0.03910076  | 0.805254826  |
| Q9R0H0 | 0.021141309 | -0.71311846  |
| Q9R1C0 | 0           | Inf          |
| Q9Z1W8 | 0.048950905 | 1.114910057  |
| Q9Z277 | 0.013571612 | 0.622054056  |

---

Table S14 P5.vs.HDF-MOD.diff\_prot

| Protein    | Pvalue      | log2FC       |
|------------|-------------|--------------|
| A0A075B5P5 | 0.040574907 | -1.3618594   |
| A0A087WR20 | 0.008072046 | 0.631960607  |
| A0A087WRE9 | 0.01591287  | -2.801913886 |
| A0A0A0MQC6 | 0.013102784 | -1.029400404 |
| A0A0A6YVU9 | 0.003968809 | -1.665551348 |
| A0A0A6YX40 | 0.02490613  | 0.66669      |
| A0A0G2JDE8 | 0           | Inf          |
| A0A0G2JEA9 | 0.02856065  | 1.427379605  |
| A0A0G2JEM4 | 0           | Inf          |
| A0A0G2JFW6 | 0.028716673 | 1.156720971  |
| A0A0G2JH17 | 0.019904253 | 0.677214759  |
| A0A0R4IZY2 | 0.018060534 | -1.605145763 |
| A0A0R4J041 | 0.04854746  | 0.651251811  |
| A0A0R4J0J5 | 0.025632299 | 0.810157623  |
| A0A0R4J0K2 | 0.010281006 | 0.672201529  |
| A0A0R4J0S1 | 0.048441911 | 0.661059845  |
| A0A0R4J101 | 0.041880705 | -0.848655689 |
| A0A0R4J1Y3 | 0.049966206 | -0.622823903 |
| A0A0R4J233 | 0           | Inf          |
| A0A0U1RNF2 | 0.013239218 | 0.628230414  |
| A0A0U1RNT8 | 0.036245354 | -0.692358069 |
| A0A140LHC1 | 0.034916369 | 0.642385466  |
| A0A140LJB7 | 0.003073408 | 0.662459764  |
| A0A140LJB8 | 0           | Inf          |
| A0A1L1SR11 | 0.02208938  | -2.103112928 |
| A0A1Z4EAV4 | 0.007622514 | -1.817376486 |
| A0A2C9F2B5 | 0           | Inf          |
| A0A2U3TZ56 | 0.040584139 | 0.687465758  |
| A0A2U3TZF4 | 0.043113567 | 0.706281547  |
| A0A2X0SYS9 | 0.040744042 | 0.749535492  |
| A0A338P693 | 0.04136335  | -0.773526565 |
| A0A345IT93 | 0.024314837 | -0.978426989 |
| A0A3B0ITG8 | 0.014009127 | 0.947100903  |
| A0A3Q4L2Q3 | 0           | Inf          |
| A0A4W9     | 0.041711973 | -0.914570289 |
| A0A571BES1 | 0           | Inf          |
| A0A571BG95 | 0.005447531 | -2.677439797 |
| A0PJK9     | 0.010752958 | -0.902342723 |
| A1E2H8     | 0.03159211  | 0.670586731  |
| A1L013     | 0           | Inf          |
| A2A615     | 0.006471134 | -1.074682776 |
| A2A654     | 0.030241888 | 1.557756066  |
| A2A6Q8     | 0.026168053 | -2.570870833 |
| A2A8W8     | 0.039305433 | -1.056720389 |
| A2ABV3     | 0.012840871 | 0.722313351  |
| A2AE94     | 0.049918802 | 0.829244609  |
| A2AEB3     | 0.000948419 | 1.330178471  |
| A2AG68     | 0.011988158 | 1.033194853  |
| A2AHX9     | 0.0426161   | 1.001419176  |
| A2AI08     | 0.024097209 | 0.615763351  |
| A2AIY3     | 0.011345685 | 1.622153898  |
| A2AQY8     | 0.049089273 | 0.759825867  |
| A2BEE9     | 0.017548563 | 0.965075976  |
| A2CF65     | 0.0457538   | 0.833173481  |
| A3KGL9     | 0.033363099 | 1.473535176  |
| A3QM89     | 0.019678849 | -2.795047841 |

|        |             |              |
|--------|-------------|--------------|
| A4FUU4 |             | 0 Inf        |
| A5A4Y9 | 0.025155173 | 0.693020277  |
| B0QZH9 | 0.01187348  | 0.983345703  |
| B1AQ75 | 0.015630548 | -1.013956854 |
| B1AUY7 | 0.03767752  | 0.602567428  |
| B1AVH7 | 0.004990419 | 0.636686425  |
| B1AYG6 | 0.037768012 | 0.777022085  |
| B1AZ46 | 0.016373637 | 0.872829617  |
| B2RUJ9 | 0.049200527 | 0.623153233  |
| B2RY90 | 0.033132263 | -0.711144874 |
| B7STB7 | 0.03250992  | 0.756938415  |
| B7ZN33 | 0.034123187 | 0.825202706  |
| B7ZNR0 | 0.01630967  | 0.710068606  |
| B7ZWE5 | 0.002978467 | 3.366373888  |
| B9EKB3 | 0.038770065 | 0.766063689  |
| B9EKG3 | 0.024585783 | 1.174794908  |
| C6EQG7 | 0.033901219 | -1.275880151 |
| D3YU58 | 0.003113738 | 0.660617189  |
| D3YU80 | 0.002251789 | 0.707508061  |
| D3YVU0 | 0.000251694 | -2.237768228 |
| D3YX08 | 0.027564532 | 0.725326958  |
| D3YY50 | 0.006266532 | 1.322889089  |
| D3YZD8 | 0.00976554  | -0.680501453 |
| D3Z079 | 0.041103756 | 0.838250709  |
| D3Z0Z6 | 0.027478074 | 1.019199894  |
| D3Z3L3 | 0.012171592 | 0.811370305  |
| D3Z3V1 | 0.047313918 | -1.39087675  |
| D3Z5N5 | 0.006011903 | -0.956166319 |
| D3Z5N6 | 0.016529107 | 0.670528539  |
| D3Z5T4 |             | 0 Inf        |
| D3Z600 |             | 0 Inf        |
| D3Z6T3 | 0.024074399 | 1.265001576  |
| D3Z794 | 0.043574039 | 1.527011549  |
| D3Z7C0 | 0.042381326 | 0.765189311  |
| E0CX53 | 0.027459467 | -0.867984673 |
| E0CZ22 | 0.005850806 | 0.795199078  |
| E9PV38 | 0.009693105 | 1.922489745  |
| E9PWG6 | 0.044418688 | 1.362216853  |
| E9PWK7 | 0.043082452 | 0.596979568  |
| E9PX10 | 0.020335392 | 0.843063568  |
| E9PY55 | 0.046604682 | 0.885072247  |
| E9PYL6 | 0.01375008  | 1.236323355  |
| E9Q1B2 | 0.004729104 | -1.48134587  |
| E9Q265 | 0.045954671 | 0.664505705  |
| E9Q421 | 0.039620423 | 0.703228165  |
| E9Q4T9 | 0.032058846 | 0.868097344  |
| E9Q634 | 0.023056084 | 0.720268747  |
| E9Q6K1 | 0.024136607 | 0.608336145  |
| E9Q7D5 | 0.040084118 | 1.505180115  |
| E9Q7N5 | 0.016143501 | 0.715416003  |
| E9QB01 | 0.000581219 | -0.835279984 |
| E9QLL2 | 0.006315412 | -0.62700949  |
| E9QN12 | 0.022241617 | 0.654301736  |
| E9QNL5 | 0.042797432 | -1.064426413 |
| E9QPD7 | 0.020395402 | 0.966440912  |
| F2Z3U4 | 0.024877491 | -1.128390536 |
| F6SRV1 | 0.034723356 | 0.661058165  |
| F6U529 | 0.042423057 | 0.672302574  |

|        |             |              |
|--------|-------------|--------------|
| F7ACR9 | 0.041899251 | 2.482487541  |
| F8VQ79 | 0.014274275 | -0.943769237 |
| F8WHW6 | 0.038292017 | 0.836446305  |
| F8WIJ0 | 0.032125744 | 1.015445225  |
| G1UCX4 | 0.014727718 | -1.063577626 |
| G3UYU5 | 0.0234913   | -0.706372739 |
| G3X8T2 | 0.002067951 | 0.78858629   |
| G5E898 | 0.02127746  | 0.861855905  |
| G5E8L8 | 0           | Inf          |
| G5E8U9 | 0           | Inf          |
| H3BL34 | 0           | Inf          |
| I7DM66 | 0.011215322 | -0.701517593 |
| J3QNU6 | 0.002498996 | -0.645116956 |
| K4DI58 | 0.043718721 | -1.386970001 |
| O08832 | 0.004907978 | -0.723163779 |
| O08919 | 0.028757517 | -0.794777272 |
| O35127 | 0           | Inf          |
| O35136 | 0.006491195 | -1.408120348 |
| O35215 | 0.001559108 | 0.618842781  |
| O35621 | 0.032175458 | 1.605335934  |
| O35640 | 0.038322543 | 1.358179919  |
| O35954 | 0.02755992  | -1.123304649 |
| O54833 | 0.026061772 | 0.58590784   |
| O54983 | 0.021114015 | 0.869971632  |
| O55100 | 0.00176778  | -0.872402394 |
| O70475 | 0.031034883 | -0.9411306   |
| O70572 | 0.014932801 | -0.644193474 |
| O88312 | 0.00401961  | -1.111069238 |
| O88736 | 0.039373117 | 0.686206426  |
| O88879 | 0.001182197 | 1.599698547  |
| O89086 | 0.00179026  | 0.67846321   |
| P00329 | 0.02923063  | 1.430386997  |
| P01756 | 0.047474919 | 1.038636503  |
| P03995 | 0.014823753 | -0.669393846 |
| P04104 | 0.028174081 | -0.944168147 |
| P04925 | 0.035790058 | -0.674312499 |
| P05532 | 0.011323066 | -1.282741488 |
| P05533 | 0           | Inf          |
| P11438 | 0.025401589 | 0.646407839  |
| P11725 | 0.009499305 | -1.360538122 |
| P12804 | 0.034873613 | -1.235605255 |
| P12960 | 0.02275696  | -1.167431265 |
| P13634 | 0.019517447 | -2.737787129 |
| P15105 | 0.018011438 | 0.752160735  |
| P20060 | 0.004558264 | 0.893427795  |
| P20065 | 0.025883045 | 0.652880968  |
| P24549 | 0.025754331 | -1.180764219 |
| P24815 | 0.001789987 | -2.741341831 |
| P25085 | 0.002426907 | 1.555677595  |
| P26150 | 0.011223696 | -1.913342902 |
| P32261 | 0.00465037  | 0.609672964  |
| P35285 | 0.041743529 | -1.078567993 |
| P37889 | 0.034410446 | 0.643367662  |
| P38060 | 0.014626534 | -0.688978201 |
| P42232 | 0.027178876 | 0.596983293  |
| P43024 | 0.047029906 | -0.957067169 |
| P47738 | 0.01627294  | 0.751627623  |
| P47867 | 0.002944938 | -1.440980909 |

|        |             |              |
|--------|-------------|--------------|
| P48962 | 0.011374851 | -0.590527992 |
| P49182 | 0.043222481 | -0.687349168 |
| P52795 | 0.002405712 | -1.88101526  |
| P54869 | 0.000372388 | -2.852133882 |
| P55095 | 0.044495899 | -1.296895662 |
| P63239 | 0.013356388 | -0.986389927 |
| P63268 | 0.023575103 | -2.001347292 |
| P70280 | 0.042148954 | 0.644066279  |
| P80560 | 0.013502335 | 1.061363157  |
| P97298 | 0.035544439 | 0.710110061  |
| P97350 | 0.008405268 | 1.073477166  |
| P97452 | 0.045926941 | 0.59504666   |
| P97770 | 0.035579863 | 0.711696676  |
| P97797 | 0.013339425 | 0.699017562  |
| P97825 | 0.019310129 | 0.60431727   |
| Q03160 | 0.021844724 | 0.615892659  |
| Q03517 | 0.017821504 | -0.982560427 |
| Q05117 | 0.017493245 | 0.766570568  |
| Q059T5 | 0.010522563 | -0.873218754 |
| Q05A75 | 0.010536462 | -1.005897261 |
| Q05DI2 | 0.026018593 | 2.058618927  |
| Q07417 | 0.023516959 | -0.608949236 |
| Q08189 | 0.023211132 | 2.598130178  |
| Q08331 | 0.01884627  | -1.100741929 |
| Q0P6I6 | 0.033688373 | -2.600646029 |
| Q0VGU0 | 0.009111062 | 0.63118729   |
| Q148B1 | 0.033912656 | -2.051092853 |
| Q1A602 | 0.045689855 | 0.614394665  |
| Q1JPR8 | 0.027913567 | -1.021391179 |
| Q3TB11 | 0.047731675 | 0.956408864  |
| Q3TCU2 | 0.047135178 | 1.109974596  |
| Q3TDD9 | 0.011671109 | -1.583702538 |
| Q3TDX8 | 0.047576524 | -1.617709204 |
| Q3TEZ2 | 0.040601931 | 0.640961854  |
| Q3TFP0 | 0.013349702 | 0.696773675  |
| Q3TGI0 | 0.047528411 | 0.854731486  |
| Q3TH64 | 0.038250572 | -0.733676202 |
| Q3TH99 | 0.018810083 | 0.702423173  |
| Q3TJ28 | 0.016798445 | 1.039262178  |
| Q3TN34 | 0.04048115  | 0.590097048  |
| Q3TQB2 | 0.027463002 | -0.970758018 |
| Q3TZG8 | 0.001939134 | -0.788642042 |
| Q3U0F2 | 0.003335826 | 0.889048366  |
| Q3U1V6 | 0.029594687 | -2.744926505 |
| Q3U3C2 | 0.028388236 | 0.905122239  |
| Q3U3R4 | 0.038703976 | -1.11459509  |
| Q3U4N2 | 0           | Inf          |
| Q3UC32 | 0           | Inf          |
| Q3UDW8 | 0.006233725 | 0.644003816  |
| Q3UGS4 | 0.021468066 | 0.734932625  |
| Q3UH06 | 0           | Inf          |
| Q3UIR2 | 0.017770395 | 0.933795091  |
| Q3URG1 | 0.037031597 | -0.63251785  |
| Q3USF0 | 0           | Inf          |
| Q3UVC9 | 0           | Inf          |
| Q3UWI3 | 0.032288908 | -0.811319192 |
| Q3UWQ9 | 0.003677485 | -1.362090534 |
| Q3UZZ6 | 0.014183684 | -0.902647861 |

|        |             |              |
|--------|-------------|--------------|
| Q3V0N8 | 0.042487329 | 0.810164313  |
| Q504M2 | 0.021813283 | 0.96088436   |
| Q545J3 | 0.015611915 | 0.792132795  |
| Q546X9 | 0.012882728 | 1.377232162  |
| Q549X6 | 0.001073334 | -1.721275197 |
| Q566C3 | 0.027220658 | -2.000173553 |
| Q5FWI3 | 0.041237885 | 1.15240221   |
| Q5JCT0 | 0.004296973 | -1.108108574 |
| Q5RKZ7 | 0.048056313 | -1.017071944 |
| Q60590 | 0.027368377 | 1.0988408    |
| Q60GT3 | 0.002219607 | -0.990401545 |
| Q61469 | 0.021971628 | -0.838743301 |
| Q61555 | 0.014125973 | 0.916324893  |
| Q61789 | 0.041696013 | 0.840102853  |
| Q62469 | 0.021692867 | -0.603602797 |
| Q62470 | 0.008119801 | 0.660602901  |
| Q64299 | 0.015103236 | -0.708175458 |
| Q69ZC8 | 0           | Inf          |
| Q6A0D0 | 0.006336041 | 1.456841002  |
| Q6NS52 | 0           | Inf          |
| Q6P549 | 0.011122346 | -1.678335202 |
| Q6P5F7 | 0           | Inf          |
| Q6P6I6 | 0.011949763 | 1.737663501  |
| Q6P6J9 | 0.042863956 | 1.461914811  |
| Q6P6M5 | 0.021600134 | 0.604529741  |
| Q6PAC3 | 0.007668009 | 1.073569641  |
| Q6PAV2 | 0.045483474 | 0.654866434  |
| Q6PCN7 | 0.025905179 | -1.169214455 |
| Q6PJN8 | 0.039459899 | -1.533205218 |
| Q711T7 | 0.028998321 | 0.946050594  |
| Q71RI9 | 0.030329603 | 0.68972926   |
| Q7M759 | 0.032531281 | -0.722968241 |
| Q7TQ62 | 0.033108897 | 0.907159047  |
| Q7TSJ2 | 0.049540144 | -0.621201877 |
| Q80TR8 | 0.012029954 | 0.656111658  |
| Q80VH1 | 0           | Inf          |
| Q80ZW2 | 0.013109543 | -1.258532958 |
| Q812G0 | 0.014209314 | 0.882935371  |
| Q8BG60 | 0.045347114 | 2.037909241  |
| Q8BGT1 | 0.004253548 | -0.806794604 |
| Q8BHJ6 | 0.029113052 | 0.733926304  |
| Q8BJF9 | 0.000867072 | 0.83037145   |
| Q8BK03 | 0.000949958 | -1.797112136 |
| Q8BMA3 | 0           | Inf          |
| Q8BMQ8 | 0.011418034 | 1.153357839  |
| Q8BND5 | 0.026881145 | 0.866913509  |
| Q8BPP1 | 0.029623471 | -1.127235213 |
| Q8BPZ8 | 0           | Inf          |
| Q8BVF2 | 0.007214095 | 0.83672138   |
| Q8BVU5 | 0.001408438 | 0.682984167  |
| Q8BXR1 | 0.025414185 | -1.238412775 |
| Q8BY82 | 0.033670102 | 1.475220885  |
| Q8BZR9 | 0.019143602 | 0.682899351  |
| Q8C0Y2 | 0.004904891 | -0.878807857 |
| Q8C3I8 | 0.018655347 | 0.61682174   |
| Q8C3X2 | 0.016317546 | 1.618154591  |
| Q8C460 | 0.002044407 | -1.316705019 |
| Q8C5Y6 | 0.037691938 | 1.188526087  |

|        |             |              |
|--------|-------------|--------------|
| Q8C7S2 | 0.008858503 | 0.637222983  |
| Q8CCA5 | 0           | Inf          |
| Q8CEW9 | 0.031829352 | 0.871162261  |
| Q8CJF9 | 0           | Inf          |
| Q8K199 | 0.026640373 | 2.037169659  |
| Q8QZY6 | 0.033505808 | 0.658879369  |
| Q8R034 | 0           | Inf          |
| Q8R084 | 0.027587306 | -0.81447149  |
| Q8R0K2 | 0.001191215 | 1.368086639  |
| Q8R0Y6 | 0.018534118 | 1.191199186  |
| Q8R191 | 0.021224749 | -0.994564183 |
| Q8R238 | 0.006505907 | 0.637558474  |
| Q8R2Y0 | 0.005934007 | -0.632536659 |
| Q8R3P6 | 0.021774111 | -1.608527454 |
| Q8VBZ3 | 0.004502429 | 0.585985491  |
| Q8VCC1 | 0.029333934 | -0.8335985   |
| Q8VCT4 | 0.014844018 | -0.969980732 |
| Q8VCW8 | 0.001040208 | -1.166465868 |
| Q91VE6 | 0.033719614 | 0.666569169  |
| Q91W87 | 0.03883639  | 1.230524749  |
| Q91WU0 | 0.005159417 | -1.568644294 |
| Q91XG7 | 0.000350561 | 0.74625532   |
| Q920E7 | 0.02441974  | 1.45318009   |
| Q921C5 | 0           | Inf          |
| Q921W7 | 0.049524162 | 0.784999254  |
| Q923B6 | 0           | Inf          |
| Q923L7 | 0.014319259 | -1.294139406 |
| Q99J99 | 0.012094624 | -0.808381106 |
| Q99KG5 | 0.01314323  | 0.944400986  |
| Q9CR80 | 0.011188515 | 1.09755222   |
| Q9CWS0 | 0.010828458 | -0.751730342 |
| Q9CWW6 | 0.037548124 | 0.626145955  |
| Q9CYT6 | 0.001725648 | 1.207175398  |
| Q9CZ83 | 0.049792288 | -1.00670531  |
| Q9D0B6 | 0.042446053 | 0.729759393  |
| Q9D1H9 | 0.029997912 | -0.971858482 |
| Q9D2X6 | 0.045562642 | 1.640440951  |
| Q9D306 | 0.020762681 | -1.516128949 |
| Q9D3W4 | 0.025877726 | 1.484639755  |
| Q9D6U8 | 0.000527013 | -0.754002542 |
| Q9D6Y7 | 0.044460179 | -0.665355607 |
| Q9D706 | 0.029604233 | 1.463211711  |
| Q9D7V1 | 0.022531186 | 1.096263504  |
| Q9D8W7 | 0.008816238 | -1.197226486 |
| Q9DB60 | 0.009345217 | 0.840913323  |
| Q9DBK7 | 0.040375069 | 0.657847371  |
| Q9DCM0 | 0.038632667 | -0.72950499  |
| Q9DD20 | 0.016217148 | -1.32027154  |
| Q9EQP6 | 0.022542634 | -1.428543866 |
| Q9JJ06 | 0.000168336 | -0.796636261 |
| Q9JJC6 | 0.026708252 | 1.788724843  |
| Q9QUG9 | 0.047228205 | -0.718811581 |
| Q9QY23 | 0.005983147 | 1.069196524  |
| Q9R1C0 | 0           | Inf          |
| Q9Z1W8 | 0.028030393 | 1.944819669  |
| S4R2K0 | 0           | Inf          |

---



# Supplementary materials 1

## Qualitative analysis of chemical composition of Xianlian Jiedu Compound based on UPLC-LTQ-Orbitrap-MS

### 1 Instrument and Materials

#### 1.1 Instrument

Dionex Ultimate ultra-high-performance liquid chromatography , LTQ-Orbitrap Velos Pro mass spectrometer (Thermo, United States); Waters ACQUITY UPLC BEH C18 column (2.1 mm×100 mm, 1.7 μm); Xcalibur 3.0 mass spectrometry workstation software, Metworks 1.3 and Mass Frontier 7.0 analysis software (Thermo, United States), WH-Mini Vortex Mixer (Huxi Analysis Instrument Factory, Shanghai , China) ; BT125 electronic balance(sartorius, Germany); Anke GL-16GII centrifuge(Anting Scientific Instrument Factory, Shanghai, China); KQ-250E ultrasonic cleaner(Hechuang Ultrasonic, Kunshan,China); EPED ultrapure water system(Yida Technology Development Co, Nanjing, China)

#### 1.2 Materials

Chemical standard Astragaloside IV, Verbasil-7-O-β-D glucoside, Verbasil isoflavone glycosides were purchased from Chengdu Biopurify Technology Development Co; Quercetin, Luteolin, (+)-catechin, Atractylone, Atractylactone I, Atractylactone II, Kaempferol, β-sitosterol, curcumin, curcumol, berberine, coptisine, and berberine were all purchased from Shanghai Yuanye Biological Technology Co. matrine, oxynitrazine Ginseng was purchased from Nanjing Chunqiu Biological Engineering Co, (HPLC ≥ 98%). The freeze-dried powder of Xianlian Jiedu Compound was made by the laboratory. Methanol (MS grade, Merck), acetonitrile (MS grade, Merck), formic acid (MS grade, Shanghai Maclean Biochemical Technology Co.).

### 2 Method

#### 2.1 Analytical Conditions of UPLC-LTQ-Orbitrap-MS.

The mobile phase comprised 0.1% formic acid (v/v) aqueous solution (A) and acetonitrile (B). The elution gradient was set as follows: 0.0–4.5 min, 5.0% B; 4.5–6.0 min, 5.0–15.0% B; 6.0–7.5 min, 15% B; 7.5–9 min, 15%-

18% B; 9-11 min, 18%-27% B; 11-16 min, 27%-35% B; 16-18 min, 35%-60% B; 18-20 min, 60%-5% B. The flow rate was 0.4 mL/min, and the injection volume was 2  $\mu$ L, with the autosampler conditioned at 30°C. The electron Spray Ionization (ESI), full scanning was used with a scan range of  $m/z$  80–1,500. Mass spectrometer parameters: capillary temperature, 275°C; and the sheath (N<sub>2</sub>) and auxiliary gas (He) flow rates of 40 and 10 arbitrary units, respectively. The secondary mass spectrometer adopts the trigger mode of dynamic data dependent analysis mode, and selects the highest peak of the upper level for collision-induced dissociation (CID)

## 2.2 Preparation of Standard and Quality Control Samples

Preparation of control Samples: accurately weigh astragaloside IV, verbasil-7-O- $\beta$ -D glucoside, verbasil isoflavone glycosides quercetin, Luteolin, (+)-catechin, atractylone, atractylactone I, atractylactone II, kaempferol,  $\beta$ -sitosterol, curcumin, curcumol, berberine, berberine, and coptisine standard in appropriate amounts, formulated with 60% methanol to a mass concentration of 2.46, 1.14, 2.65, 1.28, 2.37, 1.76, 2.40, 1.62, 1.18, 3.08, 0.95, 2.82, 0.708, 0.094, 0.072 mg/mL control solution respectively.

Preparation of sample solution: accurately weigh 13.5 mg freeze-dried powder of Xianlian Jiedu Compound into a volumetric flask, dilute to 1 mL with 60% methanol, sonicate for 30 minutes, and centrifuge twice (13000 rpm, 4°C) for 10 minutes each time.

## 2.3 Data Analysis

Determine the total ion chromatogram of Xianlian Jiedu Compound freeze-dried powder in positive ion mode. The software Xcalibur 3.0 (Thermo, United States) were employed to process the UPLC-MS data. To ensure the reliability of the identification results, those peaks were compared with standard samples.

## 3 Results

Total ion current chromatogram freeze-dried powder of Xianlian Jiedu Compound (**Figure 1**). 10 compounds were detected (**Table 1**).
